# Supplementary material for: The ESCRT machinery regulates retromer-dependent transcytosis of septate junction components in Drosophila
Source: eLife. 2020 Dec 30;9:e61866. doi: 10.7554/eLife.61866 (PMC7848756; doi:10.7554/eLife.61866)
Supplement: Figure 1—source data 1. [file elife-61866-fig1-data1.xlsx]

## Sheet: Tabelle1
Anterior F2 1										Quantification of SJ density (Septa/ROI ratio)
																		hhGal4 48h p35 shrub-RNAi-55
					1001055	336508	0.336153			e.g. a value of 0.33 represents 33% of the ROI consisting of electron dense septa								SJ length / ROI length
					75710													ANTERIOR		Posterior
					57585
					41761													0.336153		0.141258
					22804							0.336153						0.223929		0.167065
					64405							0.223929						0.402583		0.108648
					74243							0.402583						0.361633		0.138433
					1001938	224363	0.223929					0.361633						0.401961		0.0981399
					36878							0.401961						0.219853		0.093008
					32985							0.219853						0.373165		0.114044
					72111							0.373165						0.297764		0.162596
					82389							0.297764						0.368163		0.120786
					1000560	402808	0.402583					0.368163						0.26183		0.109225
					54918							0.26183						0.406632		0.100048
					171732							0.406632						0.40107		0.127334
					39850							0.40107						0.304642		0.0998316
					136308							0.304642						0.249403		0.084013
					965312	349089	0.361633					0.249403						0.253568		0.157817
					50040							0.253568						0.224613		0.169159
					163683							0.224613						0.286257		0.168378
					63561							0.286257						0.391459		0.130468
					71805							0.391459						0.330355		0.133224
					1002732	403059	0.401961					0.330355						0.317061		0.168918
					62514							0.317061						0.186276		0.125212
					44944							0.186276						0.437281		0.132751
					295601							0.437281						0.308364		0.0875309
					1000770	220022	0.219853					0.308364						0.271015		0.152322
					40200							0.271015						0.365427		0.129829
					28636							0.365427						0.290613		0.194749
					29120							0.290613						0.226513		0.145801
					122066							0.226513						0.335427		0.213567
					1001699	373799	0.373165					0.335427						0.292609		0.17449
					127122							0.292609						0.301721		0.291632
					33526							0.301721						0.207508		0.246749
					48166							0.207508						0.274715		0.116074
					164985							0.274715						0.33247		0.125232
					1007909	300119	0.297764					0.33247						0.235035		0.114047
					107629							0.235035						0.248635		0.162678
					63246							0.248635						0.442626		0.226311
					129244							0.442626						0.382442		0.13131
					1012215	372660	0.368163					0.382442						0.37206		0.116832
					49193							0.37206						0.386859		0.0919222
					64560							0.386859						0.229673		0.144406
					92347							0.229673						0.341018		0.111871
					57271							0.341018						0.299647		0.119962
					70456							0.299647						0.284494		0.192924
					38833							0.284494						0.217222		0.143269
					1005111	263168	0.26183					0.217222						0.339775		0.159569
					94763							0.339775						0.246467		0.0795158
					64405							0.246467						0.337725		0.1422
					104000													0.420988		0.130249
					1003075	407882	0.406632											0.298717		0.107312
					51420													0.365897		0.0365556
					91302													0.325946		0.12499
					60729													0.338231		0.260628
					204431													0.361101		0.191438
					1003516	402480	0.40107											0.343503		0.247122
					93915													0.363082		0.263204
					268715													0.325669		0.165965
					39850													0.383676		0.251283
					1000642	304838	0.304642											0.297736		0.194727
					35609													0.363587		0.177506
					269229													0.391373		0.111548
					1013897	252869	0.249403											0.241297		0.139962
					20000													0.28888		0.125165
					26000													0.260005		0.154418
					29732													0.363727		0.151741
					45343													0.257462		0.210312
					68264													0.297703		0.186139
					63530													0.35058		0.20643
					1002758	254267	0.253568											0.312274
					70937													0.325
					87727													0.322298
					95603													0.286029
					1006453	226062	0.224613											0.308802
					53852													0.303961
					41183													0.235834
					131027													0.317832
					1004639	287585	0.286257											0.360395
					98082													0.476155
					91082													0.279557
					27857													0.286132
					40497													0.356497
					30067													0.31224
					1026158	401699	0.391459											0.219824
					62769													0.253085
					48000													0.300359
					290930													0.349719
					1004599	331874	0.330355											0.297434
					80025													0.319647
					40200													0.33682
					70880													0.265051
					140769													0.431738
					1003404	318140	0.317061											0.296408
					93038													0.354824
					186269													0.360532
					38833													0.281613
					1011733	188462	0.186276											0.359814
					108462													0.233774
					80000													0.305213
					1033288	451837	0.437281											0.417071
					178986													0.245768
					131529													0.354637
					141322
					1006674	310422	0.308364
					217449
					92973
					997200	270256	0.271015
					174402
					95854
					1004287	366994	0.365427
					127279
					162049
					77666
					1001481	291043	0.290613
					74027
					110941
					106075
					1007017	228102	0.226513
					123240
					104862
					1013777	340048	0.335427
					94594
					36000
					58034
					151420
					1010715	295744	0.292609
					70257
					50000
					47413
					56604
					71470
					1000050	301736	0.301721
					103846
					98000
					61057
					38833
					1007200	209002	0.207508
					44272
					41037
					41231
					82462
					1004597	275978	0.274715
					67082
					24413
					66212
					118271
					1006872	334755	0.33247
					70711
					47074
					56000
					63812
					48826
					48332
					1000868	235239	0.235035
					72801
					52000
					74216
					36222
					1008526	250755	0.248635
					86023
					70711
					94021
					998002	441742	0.442626
					75313
					79398
					89196
					38210
					159625
					1000744	382727	0.382442
					54037
					60926
					49396
					82389
					21541
					114438
					1002022	372812	0.37206
					64031
					54589
					50596
					93744
					28636
					81216
					1002034	387646	0.386859
					80498
					307148
					1006723	231217	0.229673
					132061
					48166
					50990
					1003356	342162	0.341018
					115117
					66483
					160562
					1008383	302159	0.299647
					185311
					78638
					38210
					1002567	285224	0.284494
					117388
					58241
					36056
					73539
					1002277	217717	0.217222
					51108
					30067
					70937
					65605
					994941	338056	0.339775
					60299
					90022
					54037
					99639
					34059
					1002567	247100	0.246467
					57723
					98955
					48374
					42048
Ant F2 2
					1003613	338945	0.337725
					75313
					44272
					38626
					57689
					123045
					1006692	423805	0.420988
					52154							0.337725
					128577							0.420988
					107870							0.298717
					135204							0.365897
					1009669	301605	0.298717					0.325946
					76158							0.338231
					109252							0.361101
					68029							0.343503
					48166							0.363082
					1026522	375601	0.365897					0.325669
					104019							0.383676
					38000							0.297736
					202277							0.363587
					31305							0.391373
					1001091	326302	0.325946					0.241297
					50990							0.28888
					55606							0.260005
					120167							0.363727
					52000							0.257462
					47539							0.297703
					1010816	341889	0.338231					0.35058
					50000
					67676
					54037
					170176
					1006781	363550	0.361101
					85907
					96602
					181041
					1000552	343693	0.343503
					51884
					54037
					50000
					76577
					56569
					54626
					1005475	365070	0.363082
					48166
					122589
					59363
					134952
					1000002	325670	0.325669
					86579
					104690
					52345
					46000
					36056
					1002309	384562	0.383676
					94594
					74108
					93059
					122801
					1006588	299697	0.297736
					120067
					49031
					130599
					1005783	365690	0.363587
					134848
					230842
					1008097	394542	0.391373
					82024
					140471
					172047
					1008883	243440	0.241297
					58310
					60166
					124964
					1013765	292856	0.28888
					120416
					99639
					72801
					1003171	260829	0.260005
					80025
					119616
					61188
					1002309	364567	0.363727
					39395
					53814
					117098
					154260
					1011885	260522	0.257462
					89554
					114612
					56356
					1003133	298636	0.297703
					153883
					66753
					78000
					1000186	350645	0.35058
					196957
					153688
Ant G1 2
					1002998	313210	0.312274					0.312274
					38053							0.325
					142042							0.322298
					75392							0.286029
					57723							0.308802
					1004639	326508	0.325					0.303961
					106921							0.235834
					96104							0.317832
					123483							0.360395
					1006032	324242	0.322298					0.476155
					107629							0.279557
					118929							0.286132
					49518							0.356497
					48166							0.31224
					1001918	286578	0.286029					0.219824
					123434							0.253085
					81437							0.300359
					81707							0.349719
					1004235	310110	0.308802					0.297434
					208969							0.319647
					67082							0.33682
					34059							0.265051
					1005793	305722	0.303961					0.431738
					61741							0.296408
					80623							0.354824
					120416							0.360532
					42942							0.281613
					1008272	237785	0.235834					0.359814
					50478							0.233774
					73239							0.305213
					74673							0.417071
					39395							0.245768
					1029563	327228	0.317832					0.354637
					53666
					273562
					1008335	363399	0.360395
					69426
					293973
					1006866	479424	0.476155
					252357
					122262
					104805
					1010540	282504	0.279557
					111893
					66573
					51884
					52154
					1002678	286898	0.286132
					45607
					54406
					62097
					124788
					1026031	365777	0.356497
					121655
					137201
					106921
					1018196	317922	0.31224
					68819
					155795
					26077
					67231
					1004442	220800	0.219824
					46000
					81413
					43267
					50120
					1002449	253705	0.253085
					68029
					67676
					58000
					60000
					1005397	301980	0.300359
					158316
					106301
					37363
					1006018	351824	0.349719
					73756
					40000
					73783
					52000
					112285
					1005095	298949	0.297434
					37736
					25612
					235601
					1005356	321359	0.319647
					93231
					21633
					206495
					1013487	341363	0.33682
					32985
					44045
					132136
					132197
					1002686	265763	0.265051
					103730
					102000
					60033
					1000708	432044	0.431738
					106075
					94021
					231948
					1003795	297533	0.296408
					83259
					71554
					43081
					99639
					1001699	355427	0.354824
					31623
					104785
					154738
					64281
					1006876	363011	0.360532
					104957
					258054
					996243	280555	0.281613
					232181
					48374
					1006390	362113	0.359814
					113208
					113701
					135204
					1001553	234137	0.233774
					166012
					234137
					1004241	306507	0.305213
					81584
					154467
					70456
					1001699	417780	0.417071
					78715
					80920
					53141
					64622
					96519
					43863
					1005141	247031	0.245768
					94021
					131469
					21541
					1003725	355958	0.354637
					98082
					126301
					131575
F2 Post
					1008573	142469	0.141258						0.141258
					68469								0.167065
					74000								0.108648
					1002128	167421	0.167065						0.138433
					86579								0.0981399
					40050								0.093008
					40792								0.114044
					1007015	109410	0.108648						0.162596
					59933								0.120786
					49477								0.109225
					1010657	139908	0.138433						0.100048
					57271								0.127334
					42190								0.0998316
					40447								0.084013
					1007001	98827	0.0981399						0.157817
					36056								0.169159
					27785								0.168378
					34986								0.130468
					1002591	93249	0.093008						0.133224
					26077								0.168918
					52612								0.125212
					14560								0.132751
					1004442	114551	0.114044						0.0875309
					50990								0.152322
					63561
					1002439	162993	0.162596
					57723
					39294
					31048
					34928
					1001267	120939	0.120786
					39699
					62801
					18439
					1004050	109667	0.109225
					29120
					40497
					40050
					1001007	100149	0.100048
					29120
					38471
					32558
					1006676	128184	0.127334
					46174
					24739
					57271
					1003229	100154	0.0998316
					34928
					21260
					17889
					26077
					1004583	84398	0.084013
					24331
					30067
					30000
					1008008	159081	0.157817
					80324
					33106
					45651
					1001249	169370	0.169159
					55462
					44944
					68964
					1003709	169003	0.168378
					57271
					111732
					1003821	130967	0.130468
					47202
					50478
					33287
					1004287	133795	0.133224
					28636
					45695
					59464
					1006411	170001	0.168918
					76942
					93059
					1002519	125527	0.125212
					32985
					92542
					1004729	133379	0.132751
					68264
					65115
					1000058	87536	0.0875309
					57271
					30265
					1002944	152770	0.152322
					76105
					43863
					32802
G1 2 Post
					1003745	130315	0.129829						0.129829
					54626								0.194749
					35440								0.145801
					40249								0.213567
					1005141	195750	0.194749						0.17449
					89889								0.291632
					60166								0.246749
					45695								0.116074
					1002385	146149	0.145801						0.125232
					99459								0.114047
					46690								0.162678
					1013732	216500	0.213567						0.226311
					112018								0.13131
					77279								0.116832
					27203								0.0919222
					1005340	175422	0.17449						0.144406
					55714								0.111871
					38833								0.119962
					30000								0.192924
					28071								0.143269
					22804								0.159569
					1005477	293229	0.291632						0.0795158
					45651								0.1422
					112641								0.130249
					134937								0.107312
					1002002	247243	0.246749						0.0365556
					80623								0.12499
					126570								0.260628
					40050								0.191438
					1002734	116391	0.116074						0.247122
					24083								0.263204
					26077								0.165965
					28284								0.251283
					37947								0.194727
					1000050	125238	0.125232						0.177506
					43174								0.111548
					47539								0.139962
					34525								0.125165
					1002529	114335	0.114047						0.154418
					36222								0.151741
					49477								0.210312
					28636								0.186139
					1000810	162810	0.162678						0.20643
					36770
					31048
					52802
					42190
					1004241	227271	0.226311
					227271
					1000868	131424	0.13131
					60033
					38833
					32558
					1000560	116897	0.116832
					48662
					34176
					34059
					1001369	92048	0.0919222
					50000
					42048
					1004645	145077	0.144406
					69051
					76026
					1001792	112071	0.111871
					112071
					1001361	120125	0.119962
					96042
					24083
					1001177	193151	0.192924
					106019
					87132
					1001217	143443	0.143269
					77201
					66242
					1000050	159577	0.159569
					52038
					60000
					47539
					1004203	79850	0.0795158
					79850
					1001345	142391	0.1422
					34928
					41617
					45255
					20591
					1004988	130899	0.130249
					36878
					94021
					1000968	107416	0.107312
					52498
					54918
					1005865	36770	0.0365556
					36770
					1002351	125284	0.12499
					77201
					48083
					1000714	260814	0.260628
					224758
					36056
					1002710	191957	0.191438
					124016
					67941
					1007432	248959	0.247122
					62769
					86649
					41231
					58310
					1003139	264030	0.263204
					264030
					1000002	165965	0.165965
					36497
					39446
					90022
					1000260	251348	0.251283
					251348
					1002654	195244	0.194727
					55317
					68964
					41231
					29732
					1001369	177749	0.177506
					150546
					27203
					1014789	113198	0.111548
					65115
					48083
					1003865	140503	0.139962
					40000
					62032
					38471
					1003498	125603	0.125165
					72801
					52802
					1002337	154779	0.154418
					140357
					14422
					1000200	151771	0.151741
					83522
					32249
					36000
					1000768	210474	0.210312
					162432
					48042
					1001569	186431	0.186139
					99639
					40792
					46000
					1002397	206925	0.20643
					82608
					64031
					43081
					17205
