# Supplementary material for: The ESCRT machinery regulates retromer-dependent transcytosis of septate junction components in Drosophila
Source: eLife. 2020 Dec 30;9:e61866. doi: 10.7554/eLife.61866 (PMC7848756; doi:10.7554/eLife.61866)
Supplement: Figure 1—source data 2. [file elife-61866-fig1-data2.xlsx]

## Sheet: blank
ROI without bleaching			ROI with bleaching
ROI whole			ROI frap			Normierung->		I_whole-pre	0
t [min]	I [Graustufen]		t [min]	I [Graustufen]				I_frap-pre	0		t	I_frap-norm (t)	recovery [%]
-2			-2								-2	#DIV/0!	#DIV/0!
0			0								0	#DIV/0!	#DIV/0!
2			2								2	#DIV/0!	#DIV/0!
4			4								4	#DIV/0!	#DIV/0!
6			6								6	#DIV/0!	#DIV/0!
8			8								8	#DIV/0!	#DIV/0!
10			10								10	#DIV/0!	#DIV/0!
12			12								12	#DIV/0!	#DIV/0!
14			14								14	#DIV/0!	#DIV/0!
16			16								16	#DIV/0!	#DIV/0!
18			18								18	#DIV/0!	#DIV/0!
20			20								20	#DIV/0!	#DIV/0!
22			22								22	#DIV/0!	#DIV/0!
24			24								24	#DIV/0!	#DIV/0!
26			26								26	#DIV/0!	#DIV/0!
28			28								28	#DIV/0!	#DIV/0!
30			30								30	#DIV/0!	#DIV/0!
													#DIV/0!
									https://www.embl.de/eamnet/frap/FRAP6.html

## Sheet: 2018-05-26_posterior_larva 1
ROI without bleaching			ROI with bleaching
ROI whole			ROI frap			Normierung->		I_whole-pre	13358
t [min]	I [Graustufen]		t [min]	I [Graustufen]				I_frap-pre	15531.7		t	I_frap-norm (t)	recovery [%]
-2	13358		-2	15531.7							-2	1	100
0	12949.2		0	1839.95							0	0.122204	0
2	11874.7		2	6938.94							2	0.502567	43.3316
4	10031.2		4	6945.29							4	0.595466	53.9149
6	9487.54		6	6803.27							6	0.616716	56.3356
8	10531.8		8	6725.03							8	0.54918	48.6418
10	9886.65		10	6599.45							10	0.57409	51.4797
12	10050.8		12	7516.82							12	0.643213	59.3542
14	9790.76		14	5406.38							14	0.47491	40.1809
16	10196.2		16	5897.59							16	0.497461	42.7499
18	10140		18	6090.33							18	0.516565	44.9263
20	9101.84		20	6620.74							20	0.625603	57.3481
22	9311.56		22	6405.62							22	0.591644	53.4793
24	8965.51		24	5762.36							24	0.552773	49.0511
26	9165.94		26	5825.62							26	0.546621	48.3503
28	9113.52		28	6189.43							28	0.584099	52.6198
30	8418.3		30	5046.48							30	0.515568	44.8127
													49.1672
									https://www.embl.de/eamnet/frap/FRAP6.html

## Sheet: 2018-05-26_posterior_larva 2
ROI without bleaching			ROI with bleaching
ROI whole			ROI frap			Normierung->		I_whole-pre	10125.2
t [min]	I [Graustufen]		t [min]	I [Graustufen]				I_frap-pre	17802.9		t	I_frap-norm (t)	recovery [%]
-2	10125.2		-2	17802.9							-2	1	100
0	9552.95		0	2182.44							0	0.129933	0
2	9378.11		2	10121.5							2	0.613825	55.6155
4	7858.39		4	9396.27							4	0.680044	63.2262
6	8197.67		6	8935.97							6	0.619963	56.3209
8	7884.88		8	7444.83							8	0.537	46.7857
10	8231.8		10	7916.29							10	0.546943	47.9285
12	8200.91		12	8228.29							12	0.57064	50.652
14	7357.36		14	8304.84							14	0.641984	58.8519
16	7805.12		16	8313.02							16	0.605751	54.6875
18	7566.63		18	8821.74							18	0.663081	61.2767
20	7021.68		20	7002.94							20	0.567224	50.2594
22	7142.48		22	6792.9							22	0.540905	47.2345
24	7576.39		24	7261.58							24	0.545109	47.7177
26			26								26	#DIV/0!	#DIV/0!
28			28								28	#DIV/0!	#DIV/0!
30			30								30	#DIV/0!	#DIV/0!
													52.2351
									https://www.embl.de/eamnet/frap/FRAP6.html

## Sheet: 2018-06-06_pos. basolat._larva1
ROI without bleaching			ROI with bleaching
ROI whole			ROI frap			Normierung->		I_whole-pre	5474.18
t [min]	I [Graustufen]		t [min]	I [Graustufen]				I_frap-pre	8934.12		t	I_frap-norm (t)	recovery [%]
-2	5474.18		-2	8934.12							-2	1	100
0	4827.52		0	1786.83							0	0.226791	0
2	4837.11		2	5662.35							2	0.717262	63.4332
4	4683		4	5964.04							4	0.780341	71.5913
6	4543.27		6	5870.79							6	0.791763	73.0685
8	4526.05		8	5915.47							8	0.800824	74.2403
10	4461.35		10	5681.36							10	0.780286	71.5841
12	4580.88		12	5896.31							12	0.788677	72.6693
14	4710.11		14	6419.95							14	0.835157	78.6806
16	4651.65		16	5916.78							16	0.779374	71.4662
18	4823.72		18	6025.25							18	0.765351	69.6526
20	4447.22		20	5917.11							20	0.815245	76.1054
22	4560.31		22	5840.99							22	0.784802	72.1682
24	4565.25		24	6242.44							24	0.837832	79.0266
26	4348.28		26	5916.02							26	0.833641	78.4846
28	4482.73		28	6069.4							28	0.829604	77.9624
30	4070.96		30	5404.8							30	0.813488	75.8781
													75.093
									https://www.embl.de/eamnet/frap/FRAP6.html

## Sheet: 2018-06-06_anterior_larva 2
ROI without bleaching			ROI with bleaching
ROI whole			ROI frap			Normierung->		I_whole-pre	8879.71
t [min]	I [Graustufen]		t [min]	I [Graustufen]				I_frap-pre	11313.8		t	I_frap-norm (t)	recovery [%]
-2	8879.71		-2	11313.8							-2	1	100
0	8385.67		0	474.409							0	0.0444024	0
2	7105.53		2	920.021							2	0.101623	5.98795
4	6181.7		4	1358.71							4	0.172508	13.4059
6	6888.83		6	1016.23							6	0.115782	7.46959
8	7390.81		8	1009.54							8	0.107207	6.57224
10	7399.68		10	1127.24							10	0.119563	7.86525
12	7648.35		12	1002.27							12	0.102851	6.11641
14	7012.66		14	1002.19							14	0.112165	7.09115
16	7089.28		16	936.061							16	0.103632	6.19817
18	6731.07		18	1004.87							18	0.11717	7.61487
20	6524.11		20	1196.92							20	0.143991	10.4216
22	6285.45		22	944.772							22	0.117973	7.69888
24	6223.88		24	1143.1							24	0.14415	10.4382
26	5858.67		26	1067.71							26	0.143036	10.3217
28	4983.63		28	949.087							28	0.149469	10.9949
30	4853.37		30	1032.23							30	0.166926	12.8216
													9.56374
									https://www.embl.de/eamnet/frap/FRAP6.html

## Sheet: 2018-06-07_posterior_larva 1
ROI without bleaching			ROI with bleaching
ROI whole			ROI frap			Normierung->		I_whole-pre	5555.75
t [min]	I [Graustufen]		t [min]	I [Graustufen]				I_frap-pre	9914.88		t	I_frap-norm (t)	recovery [%]
-2	5555.75		-2	9914.88							-2	1	100
0	5178.92		0	695.618							0	0.0752639	0
2	4088.37		2	1996.13							2	0.273586	21.4463
4	4350.78		4	1795.66							4	0.231266	16.87
6	4597.37		6	1547.61							6	0.188628	12.2591
8	4655.2		8	1804.11							8	0.21716	15.3445
10	4450.74		10	1600.95							10	0.201558	13.6573
12	4894.04		12	1614.4							12	0.184842	11.8496
14	4456.4		14	1421.13							14	0.178691	11.1845
16	4569.52		16	1720.73							16	0.211007	14.6792
18	4286.34		18	2251.28							18	0.294305	23.6869
20	4528.25		20	1773.82							20	0.2195	15.5975
22	4702.17		22	1857.77							22	0.221385	15.8014
24	4318.04		24	1610.63							24	0.209009	14.463
26	4460.98		26	1617.58							26	0.203184	13.8331
28	4431.18		28	1852.54							28	0.234263	17.194
30	4415.31		30	1640.27							30	0.208166	14.3719
													16.2034
									https://www.embl.de/eamnet/frap/FRAP6.html

## Sheet: 2018-06-07_anterior_larva 2
ROI without bleaching			ROI with bleaching
ROI whole			ROI frap			Normierung->		I_whole-pre	10991.7
t [min]	I [Graustufen]		t [min]	I [Graustufen]				I_frap-pre	15020.1		t	I_frap-norm (t)	recovery [%]
-2	10991.7		-2	15020.1							-2	1	100
0	10496.1		0	531.517							0	0.0370578	0
2	9736.76		2	975.747							2	0.0733356	3.76739
4	10177.5		4	1079.27							4	0.0776034	4.21059
6	9937.78		6	1156.72							6	0.0851784	4.99725
8	9699.15		8	1319.31							8	0.0995415	6.48883
10	9440.15		10	1229.04							10	0.0952749	6.04576
12	9333.56		12	1359.96							12	0.106628	7.22473
14	9396.49		14	1434.3							14	0.111703	7.75181
16	9491.67		16	1766.88							16	0.136225	10.2983
18	9887.9		18	1591.73							18	0.117803	8.38528
20	9820.45		20	1549.56							20	0.11547	8.14297
22	9585.01		22	1544.84							22	0.117945	8.40006
24	10002.8		24	1836.84							24	0.134382	10.107
26	9366.86		26	1698.24							26	0.132677	9.92994
28	9362.05		28	1662.81							28	0.129976	9.64942
30	8990.75		30	1655.63							30	0.134759	10.1461
													9.38239
									https://www.embl.de/eamnet/frap/FRAP6.html

## Sheet: 2018-06-07_anterior_larva 3
ROI without bleaching			ROI with bleaching
ROI whole			ROI frap			Normierung->		I_whole-pre	11550.3
t [min]	I [Graustufen]		t [min]	I [Graustufen]				I_frap-pre	12347.6		t	I_frap-norm (t)	recovery [%]
-2	11550.3		-2	12347.6							-2	1	100
0	11029.3		0	573.73							0	0.0486597	0
2	11369.2		2	1520.39							2	0.125093	8.03431
4	11705.9		4	1575.09							4	0.125867	8.11559
6	11387.9		6	2025.19							6	0.166353	12.3714
8	11437.2		8	2205.93							8	0.18042	13.8499
10	11230.2		10	2062.18							10	0.171771	12.9409
12	11066.4		12	2048.09							12	0.173122	13.0829
14	10323.8		14	1906.75							14	0.172769	13.0457
16	10812.3		16	2237.41							16	0.19357	15.2322
18	10462.4		18	2095.38							18	0.187344	14.5778
20	10045.8		20	1825.1							20	0.169947	12.7491
22	10145.7		22	1869.32							22	0.17235	13.0017
24	9794.29		24	2086.3							24	0.199257	15.83
26	9591.88		26	2172.44							26	0.211862	17.155
28	8915.65		28	2062.27							28	0.216373	17.6291
30	9399.29		30	2540.44							30	0.252827	21.4611
													15.9545
									https://www.embl.de/eamnet/frap/FRAP6.html

## Sheet: 2018-06-17_posterior_larva 1
ROI without bleaching			ROI with bleaching
ROI whole			ROI frap			Normierung->		I_whole-pre	9110.98
t [min]	I [Graustufen]		t [min]	I [Graustufen]				I_frap-pre	15799.7		t	I_frap-norm (t)	recovery [%]
-2	9110.98		-2	15799.7							-2	1	100
0	8526.29		0	814.132							0	0.0550617	0
2	9341.43		2	1814.04							2	0.111982	6.02371
4	6683.68		4	1667.9							4	0.143903	9.40176
6	6512.41		6	1424.74							6	0.126156	7.5237
8	6561.77		8	1403.71							8	0.123359	7.22774
10	6650.94		10	1558.38							10	0.135116	8.47186
12	5157.44		12	1451.19							12	0.162258	11.3442
14	5426.74		14	1548.29							14	0.164523	11.584
16	4869.99		16	1369.59							16	0.162173	11.3352
18	5027.18		18	1710.51							18	0.196208	14.9371
20	4378.12		20	1286.57							20	0.169457	12.1061
22	3944.76		22	1356.56							22	0.198304	15.1589
24	3591.56		24	1403.08							24	0.225275	18.0132
26	3559.02		26	1293.1							26	0.209516	16.3454
28	3288.31		28	1296.67							28	0.22739	18.237
30	3463.3		30	1261.6							30	0.210061	16.4031
													15.317
									https://www.embl.de/eamnet/frap/FRAP6.html

## Sheet: 2018-06-17_posterior_larva 2
ROI without bleaching			ROI with bleaching
ROI whole			ROI frap			Normierung->		I_whole-pre	6460.92
t [min]	I [Graustufen]		t [min]	I [Graustufen]				I_frap-pre	9234.35		t	I_frap-norm (t)	recovery [%]
-2	6460.92		-2	9234.35							-2	1	100
0	6202.6		0	1191.99							0	0.134458	0
2	5768.32		2	5277.27							2	0.6401	58.4191
4	5388.98		4	5049.49							4	0.655586	60.2082
6	5394.98		6	4410.72							6	0.572015	50.5529
8	4602.89		8	4296.86							8	0.653143	59.926
10	5063.22		10	3914.73							10	0.540957	46.9647
12	4805.91		12	3673.73							12	0.534834	46.2572
14	4953.95		14	3502.44							14	0.494661	41.6158
16	4488.87		16	3568.88							16	0.556266	48.7334
18	4537.01		18	3268.55							18	0.504049	42.7005
20	4407.2		20	3457.82							20	0.548943	47.8873
22	4239.4		22	4113.87							22	0.678943	62.9068
24	3948.07		24	3546.26							24	0.628455	57.0737
26	3588.76		26	2952.24							26	0.575566	50.9632
28	3730.34		28	3525.82							28	0.6613	60.8684
30	3560.17		30	2815.26							30	0.553268	48.387
													52.44
									https://www.embl.de/eamnet/frap/FRAP6.html

[truncated: 4 more sheets: 2018-06-27_posterior_larva 1, 2018-06-27_posterior_larva 2, 2018-07-06_posterior_larva 1, Zusammenfassung]
