# Supplementary material for: The ESCRT machinery regulates retromer-dependent transcytosis of septate junction components in Drosophila
Source: eLife. 2020 Dec 30;9:e61866. doi: 10.7554/eLife.61866 (PMC7848756; doi:10.7554/eLife.61866)
Supplement: Figure 2—figure supplement 4—source data 1. [file elife-61866-fig2-figsupp4-data1.xlsx]

## Sheet: Tabelle1
ANTERIOR / WT			72h vps26-RNAi					POSTERIOR / RNAi		SJ density quantification by TEM analysis						Data used for graph		SJ length / ROI length
																		ANT		POST
1	0.004	4205869	2000	23759	2000		0	1	0.004	2760426	2022	30453	2022		0			0.252		0.101
2	0.3549	4090217	0.159	15945	0.159	0.504	0.252	2	0.446	2655317	0.202	-175030	0.202	0.202	0.101			0.2155		0.1485
3	0.7626	4048492	0.345	23962	0.345		0	3	0.004	2725364	2008	-42879	2008		0			0.3595		0.103
4	0.004	4207561	2008	46591	2008		0	4	0.5228	2686341	0.238	-67218	0.238	0.297	0.1485			0.2185		0.0635
5	0.5851	4118045	0.264	-139708	0.264	0.431	0.2155	5	0.1343	2619843	0.059	-41987	0.059		0			0.3295		0.089
6	0.3693	4067837	0.167	-119932	0.167		0	6	0.004	2760183	2007	-61310	2007		0			0.2615		0.111
7	0.004	4173255	2005	52279	2005		0	7	0.283	2678724	0.127	-49185	0.127	0.206	0.103			0.2745		0.1185
8	0.6763	3965481	0.307	53130	0.307	0.719	0.3595	8	0.1775	2638946	0.079	-56310	0.079		0			0.3605		0.117
9	0.6475	4087015	0.294	-116565	0.294		0	9	0.004	2693187	2049	-102848	2049		0			0.3785		0.067
10	0.2638	4016847	0.118	-135000	0.118		0	10	0.283	2656425	0.127	-93945	0.127	0.127	0.0635			0.2435		0.068
11	0.004	4166252	2000	-18514	2000		0	11	0.005	2684581	2055	-97716	2055		0			0.3085		0.0655
12	0.9592	4066847	0.437	-21161	0.437	0.437	0.2185	12	0.3933	2617839	0.178	65323	0.178	0.178	0.089			0.252		0.294
13	0.004	4173615	2024	27730	2024		0	13	0.004	2699397	2026	-94589	2026		0			0.198		0.118
14	0.3261	4109876	0.147	10305	0.147	0.659	0.3295	14	0.2686	2631233	0.12	98427	0.12	0.222	0.111			0.2995		0.1855
15	0.4316	4061992	0.194	22521	0.194		0	15	0.2302	2619311	0.102	-99866	0.102		0			0.342		0.1295
16	0.3933	4047263	0.177	57095	0.177		0	16	0.004	2737286	2010	-127294	2010		0			0.2345		0.1795
17	0.3117	4106960	0.141	25769	0.141		0	17	0.211	2574137	0.095	56310	0.095	0.237	0.1185			0.3785		0.165
18	0.004	4181569	2025	14788	2025		0	18	0.3165	2631587	0.142	56310	0.142		0			0.318		0.013
19	0.2782	4249861	0.125	-39289	0.125	0.523	0.2615	19	0.004	2626284	2047	-72185	2047		0			0.2905		0.0535
20	0.8777	4019049	0.398	-171781	0.398		0	20	0.3213	2547935	0.144	-127569	0.144	0.234	0.117			0.2135		0.019
21	0.004	4182380	2045	146446	2045		0	21	0.2014	2540171	0.09	-75964	0.09		0			0.328		0.123
22	0.001	4074468	0.476	-53236	0.476	0.549	0.2745	22	0.004	3460712	2009	55929	2009		0			0.2905		0.1825
23	0.1631	4125507	0.073	-32735	0.073		0	23	0.2974	3361156	0.134	-131009	0.134	0.134	0.067			0.341		0.0405
24	0.004	4156152	1997	89749	1997		0	24	0.004	3424857	2033	-15114	2033		0			0.2925		0.0615
25	0.2878	4053430	0.129	-72181	0.129	0.721	0.3605	25	0.3022	3343312	0.136	159228	0.136	0.136	0.068			0.2775		0.0715
26	0.001	3960338	0.53	-92366	0.53		0	26	0.004	3391932	2037	-73513	2037		0			0.3595		0.0395
27	0.1391	3996888	0.062	-129289	0.062		0	27	0.2926	3302007	0.131	-64290	0.131	0.131	0.0655			0.502		0.009
28	0.004	4124674	2017	48521	2017		0	28	0.005	6533867	2075	11073	2075		0			0.25		0.087
29	0.002	4020434	0.757	-140874	0.757	0.757	0.3785	29	0.6954	6491352	0.316	-176820	0.316	0.588	0.294			0.254		0.113
30	0.005	4032010	2115	134413	2115		0	30	0.5995	6326909	0.272	-168871	0.272		0			0.4065		0.1325
31	0.3453	3864201	0.156	-51843	0.156	0.487	0.2435	31	0.004	6421542	2021	14307	2021		0			0.3355		0.0475
32	0.2302	3895707	0.102	-64537	0.102		0	32	0.3693	6269792	0.167	-156801	0.167	0.236	0.118			0.2345		0.114
33	0.2974	3883226	0.133	-23199	0.133		0	33	0.1583	6502089	0.069	34695	0.069		0			0.2595		0.0985
34	0.2158	3840310	0.096	-39472	0.096		0	34	0.004	6545746	2007	31886	2007	0.371	0.1855			0.382		0.244
35	0.005	4015257	2076	163324	2076		#DIV/0!	35	0.3405	6282260	0.154	14826	0.154		0			0.2295		0.259
36	0.705	3866998	0.319	-20925	0.319	0.617	0.3085	36	0.283	6341868	0.128	-15945	0.128		0			0.3695		0.2205
37	0.4652	3872601	0.209	-15781	0.209		0	37	0.1966	6388442	0.089	20225	0.089		0			0.2825		0.159
38	0.2014	3971217	0.089	-11310	0.089		0	38	0.004	6537800	2010	-105157	2010		0			0.2285		0.0495
39	0.004	3994259	2011	167295	2011		0	39	0.3741	6243083	0.168	70145	0.168	0.259	0.1295			0.2785		0.207
40	0.1918	3883667	0.086	-23962	0.086	0.504	0.252	40	0.1439	6133787	0.063	77905	0.063		0			0.32		0.2175
41	0.2494	3992558	0.112	-11310	0.112		0	41	0.06715	6020947	0.028	51340	0.028		0			0.221		0.1265
42	0.6763	3909549	0.306	-19213	0.306		0	42	0.004	6269582	1999	-138909	1999		0			0.409		0.091
43	0.005	4121296	2055	-178534	2055		0	43	0.3981	5947455	0.18	45000	0.18	0.359	0.1795			0.2575		0.103
44	0.5468	4094488	0.247	12308	0.247	0.396	0.198	44	0.3981	6137289	0.179	17103	0.179		0			0.2715		0.1435
45	0.3309	4089327	0.149	1685	0.149		0	45	0.004	6489259	2022	-80272	2022		0			0.2855		0.0715
46	0.005	4090883	2060	-169837	2060		0	46	0.211	6288252	0.094	100784	0.094	0.33	0.165			0.2095		0.13
47	0.4652	3974393	0.211	16928	0.211	0.599	0.2995	47	0.3597	6404676	0.163	-85365	0.163		0			0.381		0.1695
48	0.187	4018210	0.083	32005	0.083		0	48	0.1631	6190117	0.073	-115017	0.073		0			0.211		0.098
49	0.6715	3977208	0.305	7431	0.305		0	49	0.004	2975919	2029	-12086	2029		0			0.5115		0.2205
50	0.004	4170426	2024	-160271	2024		0	50	0.06235	2973244	0.026	-30964	0.026	0.026	0.013			0.3225		0.107
51	0.3022	4003723	0.136	33179	0.136	0.684	0.342	51	0.004	3073004	2049	-26948	2049		0			0.349		0.188
52	0.1535	4052369	0.068	39806	0.068		0	52	0.2398	2950343	0.107	-34992	0.107	0.107	0.0535			0.391		0.186
53	0.8009	4088586	0.363	-131576	0.363		0	53	0.004	2942140	2042	1844	2042		0			0.298		0.119
54	0.259	4028007	0.117	-34287	0.117		0	54	0.08633	2964146	0.038	35538	0.038	0.038	0.019			0.3535		0.0785
55	0.004	4297445	2007	160498	2007		0	55	0.004	3005069	1997	-20541	1997		0			0.295		0.0715
56	0.3357	4201994	0.151	-29539	0.151	0.469	0.2345	56	0.3597	2943701	0.162	-12529	0.162	0.246	0.123			0.342		0.1335
57	0.3405	4123414	0.153	140826	0.153		0	57	0.187	2883768	0.084	-27897	0.084		0			0.329		0.1005
58	0.3645	4153208	0.165	169287	0.165		0	58	0.004	2836700	2040	129774	2040		0			0.3525		0.1505
59	0.004	3418490	2031	23247	2031		0	59	0.5228	2683341	0.236	-41987	0.236	0.365	0.1825			0.413		0.055
60	0.7146	3355353	0.323	-164268	0.323	0.757	0.3785	60	0.2878	2815140	0.129	-35311	0.129		0			0.4315		0.1075
61	0.4844	3293658	0.219	-147265	0.219		0	61	0.004	3039371	2000	128150	2000		0			0.325		0.1055
62	0.4748	3333364	0.215	11768	0.215		0	62	0.1823	2952436	0.081	-45000	0.081	0.081	0.0405			0.3065		0.1205
63	0.004	3406526	2027	-8200	2027		0	63	0.004	7172573	2007	-21244	2007		0			0.3455		0.1
64	0.001	3189176	0.574	172983	0.574	0.636	0.318	64	0.2734	6756915	0.123	163496	0.123	0.123	0.0615			0.352		0.1275
65	0.1391	3333374	0.062	171870	0.062		0	65	0.004	7107214	2019	-15092	2019		0			0.299		0.1945
66	0.004	3436300	2029	-2226	2029		0	66	0.3165	7012724	0.143	-23429	0.143	0.143	0.0715			0.3865		0.1265
67	0.2494	3385274	0.112	-168690	0.112	0.581	0.2905	67	0.004	7311053	2035	-39411	2035		0					0.1165
68	0.5995	3379624	0.272	179076	0.272		0	68	0.1775	7074925	0.079	146310	0.079	0.079	0.0395					0.075
69	0.3022	3281596	0.136	-146821	0.136		0	69	0.004	7317535	2023	-17258	2023		0					0.0295
70	0.1391	3280185	0.061	-30256	0.061		0	70	0.04316	7224472	0.018	-14036	0.018	0.018	0.009					0.1745
71	0.004	3362020	2027	66704	2027		0	71	0.004	7137954	2006	115614	2006		0					0.089
72	0.518	3215733	0.234	-107418	0.234	0.427	0.2135	72	0.3837	6980446	0.174	-79824	0.174	0.174	0.087					0.0685
73	0.4269	3305593	0.193	-111318	0.193		0	73	0.004	7066520	2033	149290	2033		0
74	0.004	3318057	2000	33203	2000		0	74	0.4988	7068774	0.226	-42647	0.226	0.226	0.113
75	0.4412	3204846	0.199	-146659	0.199	0.656	0.328	75	0.005	4211125	2057	-13296	2057		0
76	0.4221	3178732	0.19	-156975	0.19		0	76	0.5851	4074013	0.265	155556	0.265	0.265	0.1325
77	0.3501	3142854	0.159	-152021	0.159		0	77	0.004	4181943	2002	6659	2002		0
78	0.2398	3240982	0.108	-153435	0.108		0	78	0.1487	3843161	0.066	7595	0.066	0.095	0.0475
79	0.004	3390663	2000	33203	2000		0	79	0.06715	3913622	0.029	-26565	0.029		0
80	0.3117	3239779	0.141	-143842	0.141	0.581	0.2905	80	0.004	4236895	2015	-35176	2015		0
81	0.5324	3262145	0.242	-157620	0.242		0	81	0.3597	3968682	0.161	-42797	0.161	0.228	0.114
82	0.3117	3225256	0.141	-150255	0.141		0	82	0.1487	4068877	0.067	-66801	0.067		0
83	0.1295	3339240	0.057	-147529	0.057		0	83	0.004	4160658	2020	136406	2020		0
84	0.004	3483036	2022	31624	2022		0	84	0.4364	4018725	0.197	-36870	0.197	0.197	0.0985
85	0.4412	3461970	0.199	-97595	0.199	0.682	0.341	85	0.004	4055438	2032	118167	2032		0
86	0.5468	3322389	0.248	-147995	0.248		0	86	0.5563	3758040	0.251	-60751	0.251	0.488	0.244
87	0.5228	3293472	0.235	18435	0.235		0	87	0.5228	3909327	0.237	-60124	0.237		0
88	0.004	3387895	2004	20336	2004	0.585	0.2925	88	0.004	4051164	2012	85506	2012		0
89	0.3405	3328307	0.152	-161565	0.152		0	89	0.7866	3932017	0.357	-107103	0.357	0.518	0.259
90	0.1918	3296302	0.085	-158749	0.085		0	90	0.3597	4002174	0.161	-112380	0.161		0
91	0.5132	3255517	0.232	22203	0.232		0	91	0.004	4023061	2046	106922	2046		0
92	0.259	3303457	0.116	-150524	0.116		0	92	0.7866	3882905	0.356	-69114	0.356	0.441	0.2205
93	0.004	3435052	2009	123621	2009		0	93	0.1918	3836078	0.085	-68749	0.085		0
94	0.2254	3339095	0.1	-66801	0.1	0.555	0.2775	94	0.004	3980188	2005	137036	2005		0
95	0.3405	3351379	0.154	145408	0.154		0	95	0.5516	3932340	0.25	-37875	0.25	0.318	0.159
96	0.4316	3361847	0.195	-54162	0.195		0	96	0.1535	3833754	0.068	-45000	0.068		0
97	0.235	3264638	0.106	-51710	0.106		0	97	0.004	3324550	2000	-73589	2000		0
98	0.004	3442044	2040	123792	2040		0	98	0.2206	3214420	0.099	-77196	0.099	0.099	0.0495
99	0.001	3326658	0.543	-49248	0.543	0.719	0.3595	99	0.004	3322138	2004	-98166	2004		0
100	0.3885	3295863	0.176	-63435	0.176		0	100	0.6091	3137831	0.275	80838	0.275	0.414	0.207
101	0.004	3448161	2032	134127	2032		0	101	0.3117	3127014	0.139	-102724	0.139		0
102	0.001	3412730	0.592	-36277	0.592	1.004	0.502	102	0.004	3291485	2052	-125794	2052		0
103	0.3885	3274930	0.175	-67932	0.175		0	103	0.9592	3166233	0.435	-139899	0.435	0.435	0.2175
104	0.5228	3295254	0.237	-51009	0.237		0	104	0.004	3187171	2007	-98661	2007		0
105	0.004	3326628	2037	161838	2037		0	105	0.2734	3083804	0.123	96116	0.123	0.253	0.1265
106	0.4029	3211884	0.182	-35218	0.182	0.5	0.25	106	0.2878	3040848	0.13	-101689	0.13		0
107	0.307	3244035	0.139	-18435	0.139		0	107	0.004	3278057	2004	-44734	2004		0
108	0.3981	3155832	0.179	-11310	0.179		0	108	0.187	3245666	0.084	-38660	0.084	0.182	0.091
109	0.004	3453383	2014	169472	2014		0	109	0.2206	3290684	0.098	-57724	0.098		0
110	0.001	3336514	0.508	-14995	0.508	0.508	0.254	110	0.005	2445510	2057	-141397	2057		0
111	0.005	3384235	2089	-179760	2089		0	111	0.4556	2395239	0.206	29291	0.206	0.206	0.103
112	0.8777	3289358	0.398	-16639	0.398	0.813	0.4065	112	0.004	2504566	2029	-130534	2029		0
113	0.2254	3331724	0.101	-175030	0.101		0	113	0.6331	2400765	0.287	52431	0.287	0.287	0.1435
114	0.3261	3357433	0.147	17354	0.147		0	114	0.004	2534531	2011	-119915	2011		0
115	0.3693	3375168	0.167	6009	0.167		0	115	0.3213	2394651	0.143	58736	0.143	0.143	0.0715
116	0.005	3469228	2082	43466	2082		0	116	0.004	2571189	2017	-108356	2017		0
117	0.001	3277976	0.671	-139764	0.671	0.671	0.3355	117	0.3117	2414966	0.141	60255	0.141	0.26	0.13
118	0.004	3453523	2044	60194	2044		0	118	0.2638	2532367	0.119	72897	0.119		0
119	0.001	3411143	0.469	-149128	0.469	0.469	0.2345	119	0.004	2570294	2018	-117955	2018		0
120	0.004	3428336	2006	42434	2006		0	120	0.7482	2535136	0.339	64759	0.339	0.339	0.1695
121	0.001	3347053	0.519	-142549	0.519	0.519	0.2595	121	0.004	2546587	2017	-111663	2017		0
122	0.004	3408796	2023	11869	2023		0	122	0.4316	2471872	0.196	63435	0.196	0.196	0.098
123	0.002	3336657	0.764	7573	0.764	0.764	0.382	123	0.004	2570697	2001	-125917	2001		0
124	0.004	3457486	2004	-28021	2004		0	124	0.9688	2344295	0.441	52674	0.441	0.441	0.2205
125	0.001	3398691	0.459	-28523	0.459	0.459	0.2295	125	0.004	2575414	2005	-137213	2005		0
126	0.004	3462269	2014	73969	2014		0	126	0.4748	2511603	0.214	34992	0.214	0.214	0.107
127	0.001	3286005	0.528	101962	0.528	0.739	0.3695	127	0.004	2624664	2008	-97017	2008		0
128	0.4652	3288790	0.211	41634	0.211		0	128	0.4412	2532598	0.2	79919	0.2	0.376	0.188
129	0.004	3477671	2002	82331	2002		0	129	0.3933	2548202	0.176	75619	0.176		0
130	0.705	3358908	0.32	-106699	0.32	0.565	0.2825	130	0.004	2669794	2018	-124207	2018		0
131	0.542	3326274	0.245	-90000	0.245		0	131	0.8201	2570433	0.372	46909	0.372	0.372	0.186
132	0.004	3482672	2031	76024	2031		0	132	0.004	2697066	2001	-44290	2001		0
133	0.7482	3314397	0.339	-109604	0.339	0.457	0.2285	133	0.2638	2701927	0.118	-45000	0.118	0.238	0.119
134	0.2638	3216923	0.118	-105068	0.118		0	134	0.2686	2615357	0.12	-33111	0.12		0
135	0.004	5189276	2008	-41374	2008		0	135	0.004	2703690	2009	-65111	2009		0
136	0.8393	4793525	0.382	-26565	0.382	0.557	0.2785	136	0.235	2530011	0.104	-75379	0.104	0.157	0.0785
137	0.3885	4977389	0.175	-36870	0.175		0	137	0.1199	2531338	0.053	-55008	0.053		0
138	0.004	5186932	2013	-34001	2013		0	138	0.004	2712589	2004	-46151	2004		0
139	0.5563	4961481	0.252	128660	0.252	0.64	0.32	139	0.3165	2547922	0.143	130030	0.143	0.143	0.0715
140	0.2158	5093854	0.096	-24228	0.096		0	140	0.004	2633897	2008	-43586	2008		0
141	0.6427	4842417	0.292	-19250	0.292		0	141	0.2686	2594720	0.121	136469	0.121	0.267	0.1335
142	0.004	5068238	1995	-28590	1995		#DIV/0!	142	0.3261	2548638	0.146	-48652	0.146		0
143	0.7818	4784790	0.354	-36444	0.354	0.442	0.221	143	0.004	2692686	1980	-46703	1980		0
144	0.1966	4937115	0.088	174289	0.088		0	144	0.446	2613596	0.201	-45881	0.201	0.201	0.1005
145	0.004	5310947	2015	-59421	2015		0	145	0.004	2602817	2043	-34167	2043		0
146	0.001	4984206	0.641	119017	0.641	0.818	0.409	146	0.2782	2547336	0.124	147995	0.124	0.301	0.1505
147	0.3933	4915572	0.177	-8531	0.177		0	147	0.3933	2504147	0.177	-32905	0.177		0
148	0.004	5280757	2032	-71917	2032		0	148	0.004	2630713	2002	-27070	2002		0
149	0.3405	5062718	0.153	-90000	0.153	0.515	0.2575	149	0.2446	2416718	0.11	156501	0.11	0.11	0.055
150	0.5324	4950731	0.241	-53130	0.241		0	150	0.004	4161518	2021	-106235	2021		0
151	0.2686	4867151	0.121	-43531	0.121		0	151	0.235	4024018	0.105	-87614	0.105	0.215	0.1075
152	0.004	5076086	2011	-67457	2011	0.543	0.2715	152	0.2446	4012314	0.11	-85426	0.11		0
153	0.2062	4869612	0.092	-84560	0.092		0	153	0.004	5494693	2004	94764	2004		0
154	0.5228	4967793	0.236	-68199	0.236		0	154	0.47	5340277	0.211	-103173	0.211	0.211	0.1055
155	0.4748	4917813	0.215	-78232	0.215		0	155	0.004	5614872	2011	72117	2011		0
156	0.004	4976406	2003	76724	2003		0	156	0.5324	5410478	0.241	-100491	0.241	0.241	0.1205
157	0.988	4876310	0.448	-77593	0.448	0.571	0.2855	157	0.004	5650603	2006	111523	2006		0
158	0.2734	4872698	0.123	16504	0.123		0	158	0.259	5431302	0.117	-102995	0.117	0.2	0.1
159	0.004	5085432	1992	136336	1992		0	159	0.187	5500431	0.083	-71565	0.083		0
160	0.9209	4890595	0.419	-37349	0.419	0.419	0.2095	160	0.004	5693984	2015	-51087	2015		0
161	0.004	5109579	2011	155556	2011		0	161	0.4221	5490461	0.19	118926	0.19	0.255	0.1275
162	0.94	4878310	0.428	-43340	0.428	0.762	0.381	162	0.1487	5483225	0.065	118301	0.065		0
163	0.3453	4943222	0.155	-25115	0.155		0	163	0.004	5760103	2013	-34451	2013		0
164	0.3981	4839793	0.179	-11310	0.179		0	164	0.5084	5505842	0.23	149036	0.23	0.389	0.1945
165	0.004	7693165	2051	-78042	2051		0	165	0.3549	5523269	0.159	-20925	0.159		0
166	0.5611	7251133	0.255	-78111	0.255	0.422	0.211	166	0.004	3399518	2016	-130507	2016		0
167	0.3693	7455048	0.167	-94514	0.167		0	167	0.5563	3256494	0.253	56310	0.253	0.253	0.1265
168	0.004	7675646	2029	-88392	2029		0	168	0.004	3370717	2024	-101359	2024		0
169	0.4988	7459700	0.226	-104574	0.226	1.023	0.5115	169	0.2734	3249837	0.123	-106504	0.123	0.233	0.1165
170	0.002	7586952	0.797	95679	0.797		0	170	0.2446	3296566	0.11	-92291	0.11		0
171	0.004	7633266	2047	140383	2047		0	171	0.004	3369191	1998	-81426	1998		0
172	0.001	7319169	0.456	-37972	0.456	0.645	0.3225	172	0.1487	3245695	0.066	-53130	0.066	0.15	0.075
173	0.4173	7280646	0.189	-30735	0.189		0	173	0.187	3277174	0.084	-62103	0.084		0
174	0.004	7728540	2002	64052	2002		0	174	0.004	3298077	2003	-38875	2003		0
175	0.7626	7251302	0.345	-113962	0.345	0.698	0.349	175	0.1343	3275571	0.059	26565	0.059	0.059	0.0295
176	0.777	7306621	0.353	-118156	0.353		0	176	0.004	3253673	2012	10283	2012		0
177	0.004	7580726	2016	131830	2016		0	177	0.5228	3173432	0.237	3180	0.237	0.349	0.1745
178	0.518	7179051	0.233	-55713	0.233	0.782	0.391	178	0.2494	3113618	0.112	41820	0.112		0
179	0.001	7328660	0.549	-42735	0.549		0	179	0.004	3267404	2033	16912	2033		0
180	0.005	2878554	2069	138346	2069		0	180	0.211	3125051	0.094	-142595	0.094	0.178	0.089
181	0.001	2677249	0.484	137203	0.484	0.596	0.298	181	0.187	3159897	0.084	-152103	0.084		0
182	0.2494	2703676	0.112	-20556	0.112		0	182	0.004	3272957	2013	42089	2013		0
183	0.004	2842330	2032	121154	2032		0	183	0.2062	3198772	0.093	-135000	0.093	0.137	0.0685
184	0.002	2684603	0.707	-63911	0.707	0.707	0.3535	184	0.1007	3211916	0.044	36870	0.044		0
185	0.005	2854119	2068	-155606	2068		0
186	0.6091	2661724	0.275	22479	0.275	0.59	0.295
187	0.3261	2765646	0.146	38928	0.146		0
188	0.3741	2710619	0.169	16557	0.169		0
189	0.004	3269638	1996	-98201	1996		0
190	0.6858	3051708	0.31	81069	0.31	0.684	0.342
191	0.8249	3173118	0.374	94708	0.374		0
192	0.004	2706514	2012	-59079	2012		0
193	0.4221	2563557	0.191	105945	0.191	0.658	0.329
194	0.3453	2543499	0.155	118740	0.155		0
195	0.6906	2556058	0.312	124136	0.312		0
196	0.004	2702760	2014	-101921	2014		0
197	0.705	2560285	0.319	69075	0.319	0.705	0.3525
198	0.4508	2554512	0.205	80134	0.205		0
199	0.3981	2569358	0.181	75964	0.181		0
200	0.005	2769439	2062	-158831	2062		0
201	0.4364	2709444	0.197	36870	0.197	0.826	0.413
202	0.2542	2544849	0.114	22620	0.114		0
203	0.2734	2643661	0.123	34824	0.123		0
204	0.5084	2511956	0.23	30964	0.23		0
205	0.3597	2554133	0.162	0	0.162		0
206	0.004	2567601	2007	39421	2007		0
207	0.002	2518031	0.732	-137911	0.732	0.863	0.4315
208	0.2926	2437338	0.131	50440	0.131		0
209	0.004	2618466	2008	35770	2008		0
210	0.9832	2425568	0.448	-139764	0.448	0.65	0.325
211	0.446	2467437	0.202	38853	0.202		0
212	0.004	2951927	2014	79350	2014		0
213	0.001	2787148	0.613	74673	0.613	0.613	0.3065
214	0.004	2870879	2016	135616	2016		0
215	0.7098	2728188	0.322	-43898	0.322	0.691	0.3455
216	0.5084	2812696	0.23	-55098	0.23		0
217	0.307	2628403	0.139	-55305	0.139		0
218	0.004	2956842	2012	147175	2012		0
219	0.001	2952730	0.626	144975	0.626	0.704	0.352
220	0.1775	2818836	0.078	-38157	0.078		0
221	0.004	2979259	2004	-4639	2004		0
222	0.4269	2903951	0.193	17199	0.193	0.598	0.299
223	0.6954	2868043	0.315	-16164	0.315		0
224	0.2014	2893746	0.09	-165964	0.09		0
225	0.004	3797391	2016	1992	2016		0
226	0.002	3728724	0.773	-165570	0.773	0.773	0.3865
							ANT
