# Supplementary material for: The ESCRT machinery regulates retromer-dependent transcytosis of septate junction components in Drosophila
Source: eLife. 2020 Dec 30;9:e61866. doi: 10.7554/eLife.61866 (PMC7848756; doi:10.7554/eLife.61866)
Supplement: Figure 2—source data 1. [file elife-61866-fig2-data1.xlsx]

## Sheet: Tabelle1
	Signal quantification of apical membrane levels (performed with FiJi / a.u.)
	E-cad			Mega			NrxIV::GFP			Nrg::GFP			ATPalpha::GFP			Dlg
	WT	Vps35 -/-		WT	Vps35 -/-		WT	Vps35 -/-		WT	Vps35 -/-		WT	Vps35 -/-		WT	Vps35 -/-
	0.79289	0.843531		0.792646	0.48466		1.15765	0.657121		1.55616	0.660609		1.14843	0.470344		1.04416	1.13084
	1.13564	1.02502		0.894729	0.546731		1.34868	0.753238		1.54572	0.722683		1.0779	0.47511		1.18167	0.988026
	0.918663	0.737928		0.892416	0.639946		1.18958	0.811282		1.30329	0.672384		1.01795	0.65925		1.09365	1.01191
	1.35883	1.21956		1.05595	0.551753		0.779469	0.297927		0.645033	0.312843		1.04196	0.472516		0.776946	0.673197
	1.14961	1.07683		1.03251	0.523085		0.778652	0.397591		0.585508	0.321002		0.942412	0.467447		0.771052	0.76724
	0.950649	1.00379		0.990325	0.644832		0.687068	0.399318		0.528426	0.281628		0.898345	0.518426		0.886129	0.724092
	0.712577	0.711717		1.08717	0.654561		1.24786	0.555761		1.23175	0.585694		0.961252	0.459719		1.22757	1.10099
	0.874329	0.847729		1.13305	0.63773		1.33139	0.625786		1.06138	0.639609		0.810988	0.504931		0.9417	0.881249
	0.751157	0.720338		1.01682	0.489066		1.15925	0.709043		1.21279	0.615332		0.767554	0.489158		0.985322	0.907825
	0.913687	0.997338		0.900545	0.448699		0.829185	0.385162		0.777124	0.415898		1.00388	0.57454		1.00744	1.07627
	1.12385	1.0609		1.08407	0.514136		0.72747	0.342246		0.805959	0.3885		1.21137	0.55774		1.02934	1.12442
	1.31814	1.2657		1.11979	0.513205		0.763694	0.313718		0.746929	0.446448		1.11797	0.504378		1.05502	0.948364
	GraphPad Prism7 statistical analysis
	Table Analyzed	E-cad Levels		Table Analyzed	Mega Levels		Table Analyzed	NrxIV::GFP Levels		Table Analyzed	Nrg::GFP Levels		Table Analyzed	ATPalpha::GFP Levels		Table Analyzed	Dlg Levels
	Column B	vps35 -/-		Column B	vps35 -/-		Column B	vps35 -/-		Column B	vps35 -/-		Column B	vps35 -/-		Column B	vps35 -/-
	vs.	vs,		vs.	vs,		vs.	vs,		vs.	vs,		vs.	vs,		vs.	vs,
	Column A	WT		Column A	WT		Column A	WT		Column A	WT		Column A	WT		Column A	WT
	Unpaired t test			Unpaired t test			Unpaired t test			Unpaired t test			Unpaired t test			Unpaired t test
	P value	0.6247		P value	<0,0001		P value	<0,0001		P value	0.0003		P value	<0,0001		P value	0.3737
	P value summary	ns		P value summary	****		P value summary	****		P value summary	***		P value summary	****		P value summary	ns
	Significantly different (P < 0.05)?	No		Significantly different (P < 0.05)?	Yes		Significantly different (P < 0.05)?	Yes		Significantly different (P < 0.05)?	Yes		Significantly different (P < 0.05)?	Yes		Significantly different (P < 0.05)?	No
	One- or two-tailed P value?	Two-tailed		One- or two-tailed P value?	Two-tailed		One- or two-tailed P value?	Two-tailed		One- or two-tailed P value?	Two-tailed		One- or two-tailed P value?	Two-tailed		One- or two-tailed P value?	Two-tailed
	t, df	t=0,4962 df=22		t, df	t=11,95 df=22		t, df	t=5,224 df=22		t, df	t=4,291 df=22		t, df	t=11,64 df=22		t, df	t=0,908 df=22
	How big is the difference?			How big is the difference?			How big is the difference?			How big is the difference?			How big is the difference?			How big is the difference?
	Mean ± SEM of column A	1 ± 0,0619, n=12		Mean ± SEM of column A	1 ± 0,031, n=12		Mean ± SEM of column A	1 ± 0,07456, n=12		Mean ± SEM of column A	1 ± 0,1057, n=12		Mean ± SEM of column A	1 ± 0,03831, n=12		Mean ± SEM of column A	1 ± 0,04066, n=12
	Mean ± SEM of column B	0,9592 ± 0,05413, n=12		Mean ± SEM of column B	0,554 ± 0,02081, n=12		Mean ± SEM of column B	0,5207 ± 0,05347, n=12		Mean ± SEM of column B	0,5052 ± 0,04622, n=12		Mean ± SEM of column B	0,5128 ± 0,0169, n=12		Mean ± SEM of column B	0,9445 ± 0,04559, n=12
	Difference between means	-0,0408 ± 0,08223		Difference between means	-0,446 ± 0,03733		Difference between means	-0,4793 ± 0,09175		Difference between means	-0,4948 ± 0,1153		Difference between means	-0,4872 ± 0,04187		Difference between means	-0,05546 ± 0,06109
	95% confidence interval	-0,2113 to 0,1297		95% confidence interval	-0,5234 to -0,3685		95% confidence interval	-0,6696 to -0,289		95% confidence interval	-0,7339 to -0,2556		95% confidence interval	-0,574 to -0,4004		95% confidence interval	-0,1821 to 0,07122
	R squared (eta squared)	0.01107		R squared (eta squared)	0.8664		R squared (eta squared)	0.5537		R squared (eta squared)	0.4556		R squared (eta squared)	0.8602		R squared (eta squared)	0.03612
	F test to compare variances			F test to compare variances			F test to compare variances			F test to compare variances			F test to compare variances			F test to compare variances
	F, DFn, Dfd	1,308, 11, 11		F, DFn, Dfd	2,22, 11, 11		F, DFn, Dfd	1,944, 11, 11		F, DFn, Dfd	5,224, 11, 11		F, DFn, Dfd	5,135, 11, 11		F, DFn, Dfd	1,257, 11, 11
	P value	0.664		P value	0.2018		P value	0.2854		P value	0.0108		P value	0.0115		P value	0.7108
	P value summary	ns		P value summary	ns		P value summary	ns		P value summary	*		P value summary	*		P value summary	ns
	Significantly different (P < 0.05)?	No		Significantly different (P < 0.05)?	No		Significantly different (P < 0.05)?	No		Significantly different (P < 0.05)?	Yes		Significantly different (P < 0.05)?	Yes		Significantly different (P < 0.05)?	No
