# Supplementary material for: The ESCRT machinery regulates retromer-dependent transcytosis of septate junction components in Drosophila
Source: eLife. 2020 Dec 30;9:e61866. doi: 10.7554/eLife.61866 (PMC7848756; doi:10.7554/eLife.61866)
Supplement: Figure 3—source data 1. [file elife-61866-fig3-data1.xlsx]

## Sheet: Tabelle1
	Track Parameters imported from TrackMate				ANTERIOR	POSTERIOR		Each lane represents an individual Vps35::RFP vesicle trajectory in either anterior (WT control) or (48h) p35, shrub-RNAi expressing cells
																	ANTERIOR	POSTERIOR
	Track ID	Track X location	Track Y location	Track Z location	Track Velocity					Track Quality							Mean Velocity	Mean Velocity
	anterior / WT				MEAN	MAX	MIN	Median	STD	MEAN	MAX	MIN	Median	STD
	0	64978	18951	0	0.090	0.099	0.081	0.099	0.013	6439	6929	5764	6625	0.493			0.090	0.028
	1	40529	12118	0	0.075	0.096	0.048	0.082	0.025	7524	8677	6372	8352	1003			0.075	0.044
	2	23649	12769	0	0.061	0.214	0.007	0.056	0.040	9042	16338	5052	8404	3258			0.061	0.071
	3	35214	12836	0	0.084	0.260	0.014	0.067	0.061	10115	13415	5014	10435	2136			0.084	0.053
	4	25821	19387	0	0.080	0.166	0.014	0.077	0.054	7807	12033	5186	7798	2179			0.080	0.050
	5	42864	12825	0	0.166	0.489	0.012	0.139	0.112	6019	8274	4986	5871	0.833			0.166	0.035
	6	54120	13027	0	0.116	0.310	0.025	0.087	0.081	7378	9947	5054	7170	1245			0.116	0.046
	7	48786	13424	0	0.193	0.491	0.026	0.174	0.140	6992	9652	4979	7131	1202			0.193	0.061
	8	78406	13152	0	0.051	0.072	0.030	0.072	0.029	8642	9485	7402	9037	0.895			0.051	0.102
	9	10293	13117	0	0.082	0.241	0.012	0.082	0.063	6924	11572	5017	6257	1982			0.082	0.057
	10	46880	13821	0	0.265	0.713	0.041	0.192	0.231	9243	14350	6577	9187	2275			0.265	0.072
	11	2539	19983	0	0.089	0.150	0.028	0.078	0.042	6555	8281	5715	6558	0.611			0.089	0.063
	12	58245	13150	0	0.241	0.901	0.070	0.222	0.234	7037	8742	5245	7691	1220			0.241	0.035
	13	39185	20363	0	0.101	0.391	0.022	0.067	0.097	10453	20131	5383	9603	4310			0.101	0.082
	14	77291	13240	0	0.149	0.588	0.018	0.100	0.129	8638	15531	5092	8416	2193			0.149	0.042
	15	71360	13401	0	0.088	0.310	0.006	0.050	0.093	10913	19527	5147	9530	5016			0.088	0.038
	16	81806	14283	0	0.276	1053	0.032	0.168	0.389	6666	8369	6087	6438	0.715			0.276	0.049
	17	22430	21248	0	0.291	0.638	0.095	0.141	0.301	5988	6687	5411	6229	0.503			0.291	0.032
	18	29408	13243	0	0.134	0.336	0.015	0.105	0.101	9097	18982	5178	7818	4020			0.134	0.034
	19	62456	13396	0	0.149	0.517	0.002	0.110	0.137	5918	8929	4964	5771	0.794			0.149	0.039
	20	64517	14541	0	0.146	0.500	0.024	0.084	0.128	8692	11728	5032	8881	1960			0.146	0.040
	21	81049	13862	0	0.102	0.309	0.013	0.077	0.069	9928	19601	5225	9403	3459			0.102	0.090
	22	66807	13984	0	0.121	0.514	0.019	0.099	0.091	7917	11693	5055	7828	1709			0.121	0.056
	23	72754	14116	0	0.124	0.394	0.040	0.103	0.084	9572	17076	6810	8999	2635			0.124	0.039
	24	36605	15280	0	0.084	0.247	0.008	0.077	0.056	9765	13539	5732	10073	2297			0.084	0.046
	25	56917	13948	0	0.475	0.888	0.206	0.576	0.323	6809	8902	5189	6609	1278			0.475	0.032
	26	75694	14400	0	0.106	0.311	0.013	0.091	0.071	8104	12999	4995	7538	2266			0.106	0.033
	27	41815	14616	0	0.088	0.685	0.009	0.060	0.119	10602	17202	5009	10950	2968			0.088	0.049
	28	16303	15415	0	0.077	0.220	0.022	0.067	0.049	13272	26739	5255	12884	5688			0.077	0.042
	29	13491	15335	0	0.102	0.335	0.009	0.067	0.100	8856	15824	5750	7907	3384			0.102	0.082
	30	69437	15658	0	0.103	0.183	0.027	0.106	0.051	8968	14523	5358	7768	2831			0.103	0.034
	31	39709	15862	0	0.077	0.114	0.035	0.082	0.031	8675	10325	6084	9205	1313			0.077	0.054
	32	18381	17435	0	0.084	0.153	0.025	0.090	0.040	8790	16021	5086	8031	3035			0.084	0.068
	33	1143	9566	0	0.126	1015	0.010	0.087	0.189	7758	10666	5088	7990	1669			0.126	0.052
	34	41634	17397	0	0.077	0.117	0.027	0.110	0.044	6461	10230	5412	5502	1889			0.077	0.070
	35	8106	9834	0	0.147	0.229	0.067	0.128	0.072	7992	8752	6251	8532	0.872			0.147	0.046
	36	4006	9881	0	0.099	0.384	0.009	0.084	0.076	7782	16766	4967	6623	2802			0.099	0.043
	37	17317	10805	0	0.072	0.114	0.014	0.079	0.033	7746	12003	5084	7525	2135			0.072	0.063
	38	77824	18353	0	0.088	0.146	0.027	0.098	0.045	9045	11543	5798	9715	2251			0.088	0.034
	39	60877	18452	0	0.078	0.257	0.020	0.068	0.055	8683	21289	4995	7500	3648			0.078	0.032
	40	4133	10153	0	0.191	0.854	0.027	0.155	0.221	5916	6957	5268	5876	0.534			0.191	0.052
	41	13936	10568	0	0.096	0.141	0.035	0.111	0.055	6388	7453	5391	6958	0.846			0.096	0.122
	42	16558	17158	0	0.111	0.226	0.034	0.072	0.089	6483	8861	5512	5743	1232			0.111	0.131
	43	11082	18506	0	0.219	0.287	0.152	0.287	0.096	5837	6638	5082	5792	0.636			0.219	0.051
	44	16218	13825	0	0.070	0.070	0.070	0.070	NaN	6564	6833	6295	6833	0.269			0.070	0.039
	45	24378	21664	0	0.055	0.055	0.055	0.055	NaN	5777	5972	5582	5972	0.195			0.055	0.044
	46	49395	15724	0	0.111	0.352	0.032	0.080	0.090	5818	7015	5010	5628	0.619			0.111	0.048
	47	48025	12927	0	0.101	0.159	0.043	0.159	0.082	6972	8067	5611	7237	1020			0.101	0.034
	48	56474	16238	0	0.199	0.348	0.051	0.208	0.115	5909	7289	5026	5787	0.754			0.199	0.042
	49	10808	10464	0	0.262	1079	0.023	0.092	0.387	6074	6958	4963	6075	0.743			0.262	0.113
	50	26531	12083	0	0.061	0.078	0.049	0.057	0.015	5300	5861	5011	5174	0.330			0.061	0.046
	51	1474	17837	0	0.119	0.119	0.119	0.119	NaN	7222	7755	6688	7755	0.533			0.119	0.044
	52	55719	13273	0	0.116	0.194	0.014	0.159	0.079	6439	7592	5091	7095	1048			0.116	0.074
	53	60500	13342	0	0.139	0.139	0.139	0.139	NaN	7350	9087	5612	9087	1737			0.139	0.031
	54	33828	20787	0	0.123	0.134	0.113	0.134	0.015	5172	5251	5113	5150	0.058			0.123	0.043
	55	51230	14069	0	0.704	1008	0.399	1008	0.431	6345	7117	5800	6118	0.561			0.704	0.044
	56	20490	14190	0	0.212	0.215	0.209	0.215	0.005	5513	6108	5145	5285	0.425			0.212	0.034
	57	3545	17010	0	0.048	0.048	0.048	0.048	NaN	5048	5063	5033	5063	0.015			0.048	0.081
	58	4356	12207	0	0.098	0.194	0.005	0.106	0.060	5683	6780	5051	5707	0.525			0.098	0.048
	59	52010	18640	0	0.157	0.275	0.068	0.149	0.067	6278	7548	5010	6518	0.841			0.157	0.034
	60	49845	12970	0	0.247	1011	0.011	0.079	0.348	5817	7015	4960	5939	0.585			0.247	0.036
	61	13009	21421	0	0.058	0.120	0.019	0.033	0.055	5327	5969	4980	5309	0.390			0.058	0.040
	62	57897	15264	0	0.111	0.310	0.008	0.084	0.092	6749	8579	5052	6681	0.769			0.111	0.031
	63	11520	10237	0	0.059	0.109	0.033	0.036	0.043	5631	6052	5119	6020	0.412			0.059	0.041
	64	12116	14366	0	0.179	1008	0.015	0.081	0.261	6419	8351	4961	6286	0.901			0.179	0.036
	65	44990	17495	0	0.108	0.155	0.060	0.155	0.067	6412	6536	6248	6451	0.121			0.108	0.029
	66	0.457	16761	0	0.700	0.700	0.700	0.700	NaN	8405	11718	5092	11718	3313			0.700	0.086
	67	65125	13147	0	0.041	0.041	0.041	0.041	NaN	8571	8926	8216	8926	0.355			0.041	0.076
	68	30248	11731	0	0.091	0.222	0.025	0.106	0.075	5629	6753	5061	5594	0.563			0.091	0.033
	69	1710	8876	0	0.078	0.199	0.008	0.065	0.051	5648	7129	4970	5440	0.550			0.078	0.151
	70	34845	20910	0	0.047	0.053	0.042	0.053	0.008	6522	7605	4994	6966	1111			0.047	0.038
	71	80761	13217	0	0.073	0.141	0.018	0.067	0.034	6487	8601	4988	6576	1027			0.073	0.162
	72	6330	15381	0	0.144	0.498	0.023	0.121	0.099	7738	13263	5034	7175	2283			0.144	0.049
	73	27189	14792	0	0.067	0.086	0.047	0.086	0.027	5706	6418	5166	5533	0.525			0.067	0.036
	74	67126	18274	0	0.151	0.240	0.063	0.240	0.125	5232	5468	5074	5153	0.170			0.151	0.074
	75	74145	14712	0	0.106	0.126	0.090	0.102	0.018	5552	5787	5277	5730	0.214			0.106	0.048
	76	28085	18575	0	0.050	0.050	0.050	0.050	NaN	5961	6287	5636	6287	0.326			0.050	0.019
	77	70912	15175	0	0.098	0.107	0.089	0.107	0.013	5154	5277	5005	5179	0.113			0.098	0.107
	78	59653	13616	0	0.098	0.299	0.028	0.078	0.081	6399	9211	5114	6314	1059			0.098	0.036
	79	14369	18119	0	0.067	0.067	0.067	0.067	NaN	5522	5973	5071	5973	0.451			0.067	0.047
	80	47634	13297	0	0.080	0.080	0.080	0.080	NaN	6231	6730	5732	6730	0.499			0.080	0.097
	81	19713	11973	0	0.026	0.026	0.026	0.026	NaN	5204	5430	4978	5430	0.226			0.026	0.095
	82	55963	12695	0	0.114	0.279	0.055	0.096	0.083	5983	7025	5184	5838	0.586			0.114	0.060
	83	57774	15618	0	0.200	0.338	0.114	0.149	0.120	5577	5710	5388	5655	0.123			0.200	0.084
	84	13583	12834	0	0.089	0.193	0.010	0.077	0.061	5760	6816	5013	5788	0.449			0.089	0.049
	85	67630	14590	0	0.150	0.150	0.150	0.150	NaN	5265	5465	5065	5465	0.200			0.150	0.075
	86	37758	15126	0	0.077	0.108	0.047	0.079	0.024	5420	5889	4967	5495	0.286			0.077	0.048
	87	49726	16510	0	0.091	0.138	0.018	0.108	0.051	5699	6368	5061	5774	0.484			0.091	0.050
	88	43329	13184	0	0.221	0.554	0.034	0.167	0.203	5638	6443	5011	5663	0.442			0.221	0.049
	89	8422	21082	0	0.135	0.646	0.021	0.096	0.153	5692	6796	5085	5609	0.516			0.135	0.057
	90	72896	12948	0	0.063	0.141	0.019	0.047	0.054	5556	6143	4988	5674	0.476			0.063	0.062
	91	22341	17947	0	0.226	0.462	0.045	0.201	0.130	6594	9366	5343	6445	0.985			0.226	0.029
	92	0.000	12573	0	0.069	0.157	0.000	0.052	0.063	5921	7016	5267	5854	0.521			0.069	0.054
	93	49412	13828	0	0.094	0.094	0.094	0.094	NaN	5169	5321	5017	5321	0.152			0.094	0.087
																	0.081	0.065
																	0.064	0.068
	0	55770	10646	0	0.188	1026	0.005	0.136	0.235	6717	9485	5534	6515	1071			0.150	0.045
	1	39248	10370	0	0.129	0.243	0.031	0.112	0.075	11206	16509	6372	12979	3377			0.048	0.072
	2	66258	9190	0	0.266	0.838	0.013	0.207	0.229	10232	16100	5771	9762	3147			0.367	0.141
	3	60093	9509	0	0.137	1000	0.004	0.082	0.188	7987	13604	5625	7435	2047			0.046	0.110
	4	61948	11755	0	0.155	0.489	0.016	0.108	0.129	10251	19709	5815	9773	3189			0.067	0.060
	5	47112	10682	0	0.106	0.277	0.007	0.083	0.069	11150	19994	6052	10641	3989			0.071	0.048
	6	69396	11493	0	0.087	0.246	0.1878	0.077	0.059	11012	25114	5592	8820	5139			0.334	0.043
	7	12058	10953	0	0.338	0.842	0.033	0.140	0.440	8041	11190	6689	7511	1846			0.169	0.086
	8	4781	10948	0	0.309	0.947	0.026	0.196	0.431	8501	11099	6691	8694	1580			0.188	0.095
	9	17242	11408	0	0.070	0.175	0.015	0.052	0.047	7736	10887	5673	7414	1513			0.131	0.078
	10	8747	11752	0	0.129	0.419	0.010	0.142	0.091	7635	12283	5703	6855	1906
	11	40971	11997	0	0.112	0.332	0.031	0.093	0.080	9317	16011	5505	8411	2580
	12	64229	11815	0	0.138	0.365	0.004	0.112	0.118	7123	9236	5557	6998	1185
	13	25172	11745	0	0.071	0.171	0.012	0.062	0.039	8497	14707	5591	8437	1848
	14	59358	12723	0	0.111	0.400	0.005	0.080	0.104	9110	14914	5817	8840	2946
	15	31444	11607	0	0.108	0.372	0.017	0.081	0.088	7442	11541	5570	7271	1204
	16	33960	12711	0	0.074	0.157	0.019	0.046	0.073	6771	8146	6036	6692	0.829
	17	47041	12526	0	0.091	0.240	0.022	0.081	0.052	11273	18817	5503	11125	2817
	18	27914	13177	0	0.161	1084	0.023	0.090	0.225	8053	19558	5571	7440	2927
	19	12413	13341	0	0.072	0.190	0.005	0.067	0.039	9571	13597	5978	9264	1570
	20	37451	13413	0	0.086	0.222	0.012	0.093	0.057	9616	15061	6665	8631	2551
	21	56162	15353	0	0.232	0.844	0.028	0.101	0.263	7345	9887	5530	7034	1296
	22	61724	14696	0	0.151	0.941	0.017	0.066	0.297	9143	17528	5561	8205	3597
	23	43607	14429	0	0.052	0.114	0.003	0.049	0.031	16386	27255	10163	17342	4170
	24	79409	15139	0	0.072	0.249	0.014	0.052	0.056	7375	10970	5527	7109	1433
	25	10272	16424	0	0.144	0.453	0.017	0.092	0.126	8765	12626	6070	8498	1759
	26	6591	16133	0	0.107	0.240	0.037	0.087	0.069	6867	8628	5962	6572	0.868
	27	28508	15980	0	0.074	0.222	0.011	0.061	0.048	9574	18066	5940	9336	2161
	28	75814	16137	0	0.081	0.158	0.032	0.081	0.051	6757	7594	5869	6690	0.638
	29	59559	16623	0	0.098	0.169	0.004	0.135	0.072	8716	11626	5533	8694	1967
	30	41946	16438	0	0.122	0.400	0.021	0.099	0.087	6832	8710	5626	6909	0.837
	31	15417	16559	0	0.131	0.235	0.032	0.132	0.063	7561	11136	5542	7312	1386
	32	0.959	1823	0	0.107	0.683	0.000	0.089	0.119	8827	15468	5517	8607	2585
	33	80812	2933	0	0.203	0.855	0.012	0.152	0.192	7707	10784	5688	7599	1489
	34	79306	3453	0	0.171	0.411	0.042	0.088	0.173	8898	10330	5721	9597	1695
	35	2306	4492	0	0.090	0.710	0.007	0.060	0.111	11371	32323	5555	9231	5828
	36	28861	18364	0	0.168	0.168	0.168	0.168	NaN	6536	7146	5926	7146	0.610
	37	5823	3452	0	0.104	0.343	0.021	0.078	0.076	7994	14185	5568	7294	2130
	38	74356	5025	0	0.146	0.178	0.114	0.178	0.045	11987	13301	9614	13047	1681
	39	8979	5504	0	0.159	0.678	0.016	0.102	0.181	8491	13536	5504	8642	1885
	40	6024	5672	0	0.121	0.339	0.004	0.100	0.101	8463	17789	5573	7128	3064
	41	40807	19428	0	0.069	0.202	0.010	0.057	0.052	10885	21866	5720	8830	4741
	42	79121	5901	0	0.138	0.345	0.012	0.085	0.120	8180	12302	5940	7751	2201
	43	10848	7738	0	0.118	0.231	0.007	0.107	0.066	6637	9700	5613	6159	1126
	44	3926	7158	0	0.076	0.206	0.003	0.069	0.043	9850	27910	5699	8312	4347
	45	73060	7951	0	0.164	0.815	0.007	0.109	0.185	8552	13814	5901	7572	2559
	46	8222	7952	0	0.132	0.667	0.016	0.084	0.160	7223	9867	5553	6867	1345
	47	12802	7971	0	0.079	0.236	0.022	0.065	0.063	8787	11406	6144	8759	1653
	48	69194	8275	0	0.105	0.450	0.027	0.077	0.100	8823	13670	5596	7921	2060
	49	81122	9072	0	0.113	0.280	0.044	0.083	0.084	7302	9249	5601	7413	1072
	50	77846	8459	0	0.094	0.210	0.006	0.107	0.068	7725	13763	5655	7080	2188
	51	22039	20307	0	0.082	0.165	0.048	0.075	0.045	7793	10453	5768	7025	1752
	52	66281	8851	0	0.128	0.547	0.016	0.096	0.145	7836	11822	5574	7552	1930
	53	17731	8808	0	0.101	0.210	0.012	0.096	0.054	11224	15318	6314	10851	2584
	54	16078	8683	0	0.147	0.991	0.003	0.084	0.206	11224	33498	5573	8797	6655
	55	0.085	9333	0	0.112	0.474	0.000	0.052	0.144	6829	8474	5507	6652	0.960
	56	23023	9171	0	0.121	0.813	0.009	0.070	0.148	9725	16980	5603	8685	3542
	57	29986	9621	0	0.134	0.897	0.024	0.074	0.186	10810	16989	6490	10795	3023
	58	62830	9149	0	0.047	0.072	0.023	0.048	0.022	8224	10362	6364	8276	1457
	59	32679	9529	0	0.145	1050	0.009	0.087	0.175	10204	23403	5559	9611	4350
	60	3488	10326	0	0.064	0.276	0.004	0.043	0.075	6260	7622	5532	6232	0.612
	61	25841	10190	0	0.158	0.249	0.053	0.165	0.073	12123	14694	7995	12053	1834
	62	21472	10592	0	0.182	0.474	0.023	0.217	0.140	9678	13479	5968	9349	2547
	63	42006	10014	0	0.149	0.948	0.020	0.111	0.183	9541	18210	5508	7849	3937
	64	37661	10257	0	0.076	0.311	0.010	0.064	0.052	11193	19405	5693	9689	3925
	65	35133	10893	0	0.126	0.199	0.051	0.139	0.055	9011	11534	6094	9403	2076
	66	38305	15624	0	0.167	0.223	0.126	0.154	0.050	9255	12655	6630	9499	2211
	67	63939	18465	0	0.045	0.045	0.045	0.045	NaN	6305	6595	6016	6595	0.290
	68	62261	19483	0	0.105	0.213	0.027	0.056	0.077	7022	7712	5904	7074	0.540
	69	51913	12025	0	0.084	0.261	0.022	0.066	0.066	7316	9015	5562	7457	0.997
	70	49251	14875	0	0.092	0.220	0.002	0.082	0.067	7433	11453	5869	6688	1640
	71	17466	14689	0	0.275	0.275	0.275	0.275	NaN	7414	7522	7305	7522	0.109
	72	34317	15984	0	0.219	0.483	0.011	0.164	0.241	5761	6184	5504	5801	0.268
	73	57135	13783	0	0.094	0.208	0.010	0.076	0.070	8433	12112	5888	8659	1995
	74	76101	4517	0	0.262	1047	0.026	0.143	0.330	7449	9281	5991	7540	1052
	75	0.616	5609	0	0.147	0.352	0.029	0.144	0.107	8667	13296	5543	8646	2099
	76	71334	6524	0	0.206	1036	0.052	0.109	0.283	6762	8654	5569	6516	0.928
	77	82011	5868	0	1083	1083	1083	1083	NaN	6555	7077	6033	7077	0.522
	78	20874	9018	0	0.139	0.531	0.022	0.078	0.135	8638	12067	5510	8560	1809
	79	22160	12902	0	0.031	0.032	0.030	0.032	0.002	6280	7044	5575	6222	0.601
	80	8666	7568	0	0.158	0.158	0.158	0.158	NaN	8283	9344	7223	9344	1061
	81	35976	20580	0	0.024	0.024	0.024	0.024	NaN	6186	6744	5627	6744	0.559
	82	47926	14955	0	0.204	1093	0.008	0.077	0.326	7019	9270	5655	6625	1051
	83	27251	10073	0	0.117	0.319	0.019	0.099	0.080	9189	13201	5709	8196	2265
	84	78022	12433	0	0.103	0.234	0.006	0.138	0.085	7392	9890	5564	7713	1564
	85	27506	9635	0	0.089	0.089	0.089	0.089	NaN	7175	7269	7081	7269	0.094
	86	26802	18288	0	0.168	0.168	0.168	0.168	NaN	7942	9030	6854	9030	1088
	87	0.000	1360	0	0.052	0.105	0.000	0.105	0.074	6216	7085	5538	6024	0.646
	88	6215	6873	0	1095	1095	1095	1095	NaN	6598	7688	5508	7688	1090
	89	14844	8639	0	0.093	0.228	0.9338	0.094	0.055	7438	12071	5634	7114	1527
	90	65209	10255	0	0.133	0.636	0.014	0.069	0.170	7502	11273	5769	7452	1688
	91	4453	18092	0	0.140	0.280	0.057	0.142	0.070	6071	6493	5750	6082	0.267
	92	0.614	5049	0	0.171	1037	0.000	0.059	0.265	6974	9029	5635	6751	1050
	93	76952	4382	0	0.087	0.230	0.014	0.079	0.059	7492	11221	5609	7167	1518
	94	47767	10329	0	0.109	0.333	0.008	0.085	0.081	7968	15522	5538	7329	2292
	95	67800	6693	0	0.115	0.271	0.023	0.107	0.086	6092	6683	5714	6064	0.334
	96	74307	9091	0	0.084	0.084	0.084	0.084	NaN	7741	9615	5867	9615	1874
	97	71688	6267	0	0.491	0.772	0.210	0.772	0.397	6625	8031	5518	6326	1048
	98	66941	15698	0	0.100	0.159	0.056	0.096	0.035	8698	11581	5570	9077	1952
	99	11563	5573	0	0.079	0.079	0.079	0.079	NaN	5673	5766	5580	5766	0.093
	100	54098	14296	0	0.205	0.329	0.029	0.213	0.096	7854	11439	5860	7507	1836
	101	17543	8822	0	0.164	1016	0.010	0.091	0.241	8258	12645	5656	7776	2109
	102	30590	9685	0	0.155	1002	0.009	0.115	0.161	7486	10781	5589	7192	1401
	103	20034	13974	0	0.069	0.083	0.055	0.083	0.020	6559	7750	5884	6042	0.845
	104	43976	11675	0	0.082	0.082	0.082	0.082	NaN	6507	7433	5581	7433	0.926
	105	43433	14314	0	0.143	0.312	0.019	0.130	0.089	8849	14004	5863	8716	2016
	106	80755	2746	0	0.163	0.689	0.009	0.138	0.141	6710	8560	5552	6552	0.871
	107	27391	12047	0	0.220	1091	0.024	0.110	0.317	6874	8615	5642	6947	0.817
	108	0.000	1810	0	0.100	0.367	0.000	0.052	0.081	9686	16440	6853	9281	2258
	109	7441	15080	0	0.116	0.217	0.009	0.173	0.096	5909	6229	5558	5788	0.269
	110	75405	8287	0	0.047	0.047	0.047	0.047	NaN	6691	7153	6229	7153	0.462
	111	71327	17242	0	0.204	0.349	0.059	0.349	0.205	6493	7035	5804	6641	0.513
	112	71867	15620	0	0.083	0.144	0.016	0.071	0.048	7216	9200	5733	7396	1216
	113	33668	16947	0	0.174	0.192	0.156	0.192	0.025	6754	8077	5804	6380	0.965
	114	55366	9273	0	0.082	0.195	0.016	0.068	0.058	6322	7365	5534	6246	0.539
	115	63053	19076	0	0.077	0.077	0.077	0.077	NaN	6658	6705	6611	6705	0.047
	116	37209	13199	0	0.049	0.049	0.049	0.049	NaN	7155	8553	5757	8553	1398
	117	13746	8797	0	0.058	0.058	0.058	0.058	NaN	6446	7156	5735	7156	0.710
	118	71445	11559	0	0.099	0.157	0.041	0.104	0.046	7105	9188	5783	7099	0.976
	119	51570	10214	0	0.142	0.142	0.142	0.142	NaN	6350	6432	6269	6432	0.082
	120	77210	8262	0	0.114	0.114	0.114	0.114	NaN	6199	6504	5895	6504	0.305
	121	28038	10624	0	0.113	0.113	0.113	0.113	NaN	5772	5882	5662	5882	0.110
	122	59152	9915	0	0.207	0.676	0.053	0.172	0.166	6277	7437	5544	6207	0.631
	123	7755	8227	0	0.132	0.479	0.005	0.136	0.093	7103	9547	5662	6853	1049
	124	71086	5757	0	0.116	0.116	0.116	0.116	NaN	7171	7471	6872	7471	0.299
	125	57125	13062	0	0.087	0.087	0.087	0.087	NaN	6118	6134	6102	6134	0.016
	126	5049	5032	0	0.062	0.062	0.062	0.062	NaN	6331	6572	6089	6572	0.242
	127	62469	8756	0	0.081	0.224	0.016	0.078	0.047	7410	10638	5806	7308	1257
	128	61888	13334	0	0.173	1020	0.020	0.063	0.322	6669	7828	5525	6771	0.647
	129	31650	9164	0	0.102	0.259	0.015	0.076	0.066	7834	10050	5822	7771	0.939
	130	59394	12228	0	0.085	0.124	0.036	0.089	0.031	6708	7931	5853	6946	0.861
	131	35050	10681	0	0.082	0.104	0.060	0.104	0.031	5986	6281	5533	6144	0.325
	132	47766	18423	0	0.165	0.165	0.165	0.165	NaN	7133	7555	6711	7555	0.422
	133	64699	11494	0	0.045	0.045	0.045	0.045	NaN	7743	8333	7153	8333	0.590
	134	10712	7345	0	0.016	0.016	0.016	0.016	NaN	5608	5690	5525	5690	0.083
	135	38006	16020	0	0.096	0.100	0.092	0.100	0.005	5928	6229	5547	6009	0.284
	136	81278	1991	0	0.081	0.081	0.081	0.081	NaN	5965	6123	5808	6123	0.158
	137	66233	7869	0	0.131	0.161	0.116	0.130	0.021	6415	7163	5619	6350	0.499
	138	21873	8977	0	0.147	0.474	0.034	0.118	0.166	6208	7372	5543	6331	0.624
	139	43562	14670	0	0.104	0.150	0.025	0.138	0.069	5865	6251	5543	5980	0.273
	140	47393	12688	0	0.126	0.180	0.061	0.137	0.060	6699	7349	5933	6932	0.519
	141	47330	9902	0	0.075	0.129	0.020	0.129	0.078	6399	6904	6145	6147	0.357
	142	56044	9455	0	0.084	0.103	0.065	0.103	0.027	6332	6627	6157	6211	0.210
	143	72269	8522	0	0.028	0.028	0.028	0.028	NaN	5951	6201	5700	6201	0.250
	144	47107	13904	0	0.208	0.208	0.208	0.208	NaN	5842	6102	5582	6102	0.260
	0	42248	8918	0	0.055	0.143	0.007	0.048	0.033	13053	19596	6833	13156	4401
	1	37963	27114	0	0.048	0.176	0.000	0.052	0.062	12224	14040	10096	12670	1193
	2	32704	25918	0	0.035	0.076	0.002	0.033	0.023	9807	16613	6698	7708	3477
	3	34862	9014	0	0.067	0.187	0.003	0.050	0.053	9126	12110	6731	9231	1392
	4	32579	9075	0	0.047	0.112	0.006	0.043	0.031	11624	16256	6828	11417	2904
	5	29025	9386	0	0.036	0.088	0.008	0.031	0.020	10972	22434	6632	10182	3740
	6	18231	9814	0	0.119	0.231	0.028	0.137	0.077	8255	12749	6589	7179	2262
	7	58791	10181	0	0.062	0.141	0.005	0.062	0.038	9431	16674	6802	8742	2347
	8	56646	10312	0	0.056	0.122	0.010	0.057	0.029	13288	19320	6699	13831	3856
	9	30924	11113	0	0.079	0.206	0.019	0.086	0.062	8460	12183	6963	7593	1659
	10	40733	11289	0	0.054	0.230	0.004	0.035	0.047	15662	49708	6565	10635	10741
	11	68082	13035	0	0.161	0.362	0.028	0.157	0.098	10566	18130	6947	8816	3178
	12	75647	12379	0	0.100	0.217	0.033	0.077	0.076	10809	13101	8761	11337	1532
	13	44141	12080	0	0.136	0.292	0.012	0.135	0.077	7550	9290	6647	7358	0.844
	14	53025	12399	0	0.074	0.193	0.005	0.058	0.053	11205	16334	7542	10731	3029
	15	32955	13356	0	0.102	0.237	0.005	0.119	0.067	10402	17426	7300	9202	2886
	16	27434	12762	0	0.141	0.485	0.011	0.105	0.120	9361	12661	6617	9521	1584
	17	60347	14169	0	0.075	0.152	0.003	0.079	0.040	10904	19683	7109	11095	2877
	18	64482	13441	0	0.087	0.329	0.017	0.057	0.070	9100	13923	6556	8354	2177
	19	23284	16092	0	0.055	0.180	0.009	0.047	0.034	13698	22156	6784	13479	5671
	20	82362	16188	0	0.026	0.052	0.000	0.052	0.030	9633	10515	8912	9291	0.732
	21	1168	1834	0	0.139	0.932	0.000	0.066	0.198	10438	19660	6726	9157	3285
	22	0.423	1798	0	0.082	0.753	0.000	0.052	0.144	9932	15988	6737	9366	2304
	23	27346	17452	0	0.041	0.143	0.005	0.036	0.026	12543	36200	6546	9843	6456
	24	4049	2151	0	0.080	0.142	0.012	0.092	0.047	7963	8708	7013	8349	0.640
	25	7911	3088	0	0.107	0.241	0.014	0.058	0.093	8454	10201	7404	8200	0.874
	26	80105	3371	0	0.051	0.140	0.007	0.043	0.029	12067	21743	6761	11813	3592
	27	82362	2967	0	0.031	0.105	0.000	0.052	0.029	14146	33339	7644	12207	5505
	28	74433	4302	0	0.087	0.564	0.009	0.068	0.092	11428	19632	6937	10942	3416
	29	77904	4538	0	0.114	0.521	0.009	0.070	0.115	11593	30118	6790	10195	4762
	30	6114	4558	0	0.047	0.094	0.006	0.048	0.024	10121	16427	6695	9689	2942
	31	72705	4324	0	0.036	0.074	0.005	0.031	0.023	19404	32266	15354	16618	4840
	32	61328	4738	0	0.090	0.218	0.015	0.083	0.048	9987	14620	6740	9870	1921
	33	80581	19946	0	0.027	0.027	0.027	0.027	NaN	7332	7887	6777	7887	0.555
	34	62578	4944	0	0.063	0.098	0.027	0.064	0.036	11410	12350	9758	12183	1026
	35	64468	4768	0	0.059	0.143	0.006	0.058	0.032	13009	26741	6651	11279	5444
	36	15372	20748	0	0.109	0.176	0.027	0.160	0.068	10626	13069	7901	10617	1771
	37	78483	5505	0	0.057	0.129	0.005	0.058	0.040	13917	16646	9610	14661	2432
	38	0.000	20464	0	0.026	0.052	0.000	0.052	0.037	8686	10828	7295	7934	1537
	39	68486	5431	0	0.102	0.415	0.006	0.075	0.091	9489	18924	6586	8613	2865
	40	69160	5859	0	0.148	0.965	0.028	0.085	0.195	10638	15576	6632	11277	2877
	41	65335	20776	0	0.115	0.166	0.062	0.149	0.051	7482	8074	7055	7558	0.379
	42	48705	5745	0	0.017	0.017	0.017	0.017	NaN	8248	9301	7195	9301	1053
	43	14220	6008	0	0.046	0.113	0.015	0.045	0.025	10866	21380	6698	9719	3870
	44	57383	6052	0	0.126	0.655	0.009	0.094	0.126	11335	22617	6729	9689	4338
	45	53530	6226	0	0.064	0.147	0.012	0.059	0.036	10035	17907	6596	9228	3218
	46	50922	21551	0	0.053	0.073	0.034	0.067	0.020	7558	8388	6697	7446	0.622
	47	21438	6657	0	0.129	1073	0.013	0.077	0.223	8896	12058	6674	8928	1523
	48	17609	6273	0	0.080	0.277	0.008	0.069	0.052	9623	15298	6646	8870	2432
	49	59697	6603	0	0.173	0.377	0.032	0.165	0.115	8190	9377	6661	8758	0.979
	50	15901	6845	0	0.019	0.019	0.019	0.019	NaN	6778	6911	6646	6911	0.133
	51	12159	6742	0	0.049	0.161	0.001	0.047	0.031	12353	28248	6641	11340	5003
	52	62152	6974	0	0.058	0.134	0.014	0.057	0.030	11050	15400	6963	11235	2074
	53	50971	7105	0	0.040	0.184	0.003	0.033	0.035	19468	40046	6624	18479	8724
	54	46734	7008	0	0.137	1064	0.005	0.086	0.197	10076	16998	6673	8676	3277
	55	24812	7106	0	0.091	0.244	0.005	0.104	0.058	9726	13633	7325	9707	1858
	56	21308	6840	0	0.090	0.328	0.004	0.059	0.095	8886	13270	6663	8424	1573
	57	32809	7793	0	0.088	0.399	0.014	0.065	0.078	10499	18138	6736	9343	3210
	58	6581	24031	0	0.047	0.161	0.006	0.043	0.033	10311	14250	7278	9903	2083
	59	27149	8735	0	0.133	0.372	0.028	0.100	0.120	8457	13095	6576	8433	1977
	60	38465	8246	0	0.074	0.255	0.004	0.066	0.048	9428	18827	6722	9046	2318
	61	42791	7328	0	0.209	0.332	0.139	0.155	0.107	9910	11647	8127	11404	1622
	62	38766	8293	0	0.122	0.409	0.010	0.077	0.111	14753	26487	8384	14109	4660
	63	23321	8352	0	0.152	1055	0.010	0.085	0.212	10507	14236	6657	10508	2356
	64	49133	8038	0	0.086	0.192	0.024	0.068	0.059	9553	12055	6674	9399	1505
	65	55880	8109	0	0.003	0.003	0.003	0.003	NaN	7774	8390	7158	8390	0.616
	66	9159	8409	0	0.065	0.146	0.009	0.045	0.047	8426	11557	6600	8321	1401
	67	64667	8630	0	0.071	0.130	0.020	0.075	0.033	10102	17145	7041	9502	2542
	68	33800	12099	0	0.081	0.212	0.005	0.064	0.061	9037	12392	6699	8992	1630
	69	30038	14267	0	0.052	0.126	0.006	0.055	0.033	8372	11858	6646	8132	1411
	70	5215	2633	0	0.200	0.780	0.005	0.080	0.284	7695	11030	6612	7320	1140
	71	10164	3936	0	0.245	0.470	0.069	0.321	0.185	7655	8970	6617	7562	0.836
	72	72130	4748	0	0.115	1099	0.002	0.048	0.220	15954	29930	6851	15420	6821
	73	20951	17902	0	0.019	0.022	0.012	0.022	0.006	8009	9151	6710	9055	1104
	74	74294	6886	0	0.373	0.548	0.197	0.548	0.248	7550	8701	6960	6989	0.814
	75	25152	7778	0	0.165	1073	0.022	0.103	0.215	7564	9841	6602	7307	0.781
	76	17677	8793	0	0.141	0.238	0.056	0.129	0.092	8017	9732	6808	8106	1092
	77	60835	21417	0	0.092	0.092	0.092	0.092	NaN	6915	7082	6747	7082	0.167
	78	28335	6803	0	0.535	0.974	0.097	0.974	0.620	7218	7975	6658	7021	0.555
	79	47839	7068	0	0.125	0.281	0.023	0.116	0.071	9918	13236	7104	9873	1951
	80	9741	23323	0	0.032	0.032	0.032	0.032	NaN	6677	6760	6595	6760	0.083
	81	37982	26570	0	0.067	0.137	0.007	0.068	0.037	9230	13390	7111	8901	1469
	82	71402	11775	0	0.085	0.169	0.059	0.070	0.040	7218	8073	6730	7347	0.402
	83	26851	12313	0	0.072	0.174	0.027	0.060	0.047	8516	10654	7193	8356	0.990
	84	13238	5287	0	0.039	0.039	0.039	0.039	NaN	7355	7828	6882	7828	0.473
	85	33937	23337	0	0.048	0.122	0.017	0.038	0.028	8908	10726	6885	9264	1078
	86	63848	6910	0	0.130	0.130	0.130	0.130	NaN	7229	7518	6941	7518	0.288
	87	61265	11832	0	0.096	0.190	0.049	0.049	0.081	8146	9445	6560	8324	1031
	88	71772	4892	0	0.157	0.791	0.012	0.077	0.202	9293	15628	6554	8847	2224
	89	68619	9071	0	0.012	0.012	0.012	0.012	NaN	7328	7752	6904	7752	0.424
	90	68194	5331	0	0.074	0.124	0.002	0.094	0.054	7635	8653	6994	7539	0.642
	91	5373	2959	0	0.121	1098	0.005	0.063	0.254	7031	7743	6566	7025	0.357
	92	80593	10447	0	0.129	0.129	0.129	0.129	NaN	7710	8384	7036	8384	0.674
	93	70889	4334	0	0.095	0.095	0.095	0.095	NaN	7655	8016	7295	8016	0.360
	94	33991	23151	0	0.021	0.021	0.021	0.021	NaN	6603	6649	6556	6649	0.047
	95	18677	9571	0	0.063	0.231	0.009	0.059	0.036	7824	10769	6546	7674	0.984
	96	37904	26292	0	0.076	0.076	0.076	0.076	NaN	6850	7092	6607	7092	0.242
	97	9115	8367	0	0.044	0.071	0.007	0.068	0.031	7031	7670	6548	6951	0.385
	98	53344	6520	0	0.061	0.061	0.061	0.061	NaN	6854	7053	6655	7053	0.199
	99	17230	6161	0	0.235	0.235	0.235	0.235	NaN	7193	7586	6800	7586	0.393
	100	68909	7910	0	0.096	0.202	0.047	0.088	0.046	8059	9249	6835	8135	0.656
	101	74296	4180	0	0.060	0.152	0.010	0.052	0.051	7741	9229	6689	7708	0.687
	102	60608	14371	0	0.063	0.063	0.063	0.063	NaN	6967	7177	6758	7177	0.209
	103	37977	26085	0	0.011	0.011	0.011	0.011	NaN	6873	7040	6705	7040	0.167
	104	64671	4561	0	0.113	0.223	0.059	0.080	0.068	7284	8100	6545	7508	0.614
	105	80253	3101	0	0.042	0.064	0.017	0.045	0.024	6956	7483	6589	7041	0.346
	106	71701	5228	0	0.072	0.225	0.020	0.039	0.087	7496	8321	6802	7580	0.509
	107	53397	6498	0	0.059	0.089	0.022	0.066	0.034	6703	6840	6619	6692	0.083
	0	27424	9954	0	0.084	0.284	0.020	0.070	0.057	9542	14908	5656	10030	2252
	1	43618	11396	0	0.098	0.692	0.05015	0.080	0.098	9232	14712	5722	8928	2355
	2	31933	11112	0	0.049	0.133	0.007	0.048	0.033	10803	16689	7229	10376	2231
	3	81785	9349	0	0.571	1033	0.109	1033	0.653	7072	7865	6654	6697	0.561
	4	21463	11266	0	0.106	0.239	0.030	0.096	0.052	11721	19096	6433	11966	2708
	5	13706	12294	0	0.090	0.301	0.009	0.074	0.073	13696	34177	5703	10207	8057
	6	72584	11457	0	0.142	0.991	0.029	0.075	0.247	11442	15853	6033	12761	3569
	7	64997	20890	0	0.115	0.266	0.037	0.100	0.063	7265	10039	5827	7061	1246
	8	46505	11639	0	0.107	0.289	0.035	0.097	0.074	8818	14242	6821	8185	2143
	9	76178	12563	0	0.101	0.227	0.018	0.086	0.063	12713	27393	7649	11022	5150
	10	34902	12341	0	0.054	0.163	0.008	0.056	0.033	9656	20199	5657	9394	3429
	11	25971	11980	0	0.113	0.338	0.014	0.106	0.076	8479	13896	5640	7675	2400
	12	54810	12893	0	0.083	0.315	0.007	0.065	0.058	9190	18083	5727	8283	3078
	13	39549	13244	0	0.117	0.340	0.021	0.105	0.087	12997	31262	5856	10618	6643
	14	1194	1807	0	0.309	0.927	0.000	0.120	0.390	9755	13723	5961	9941	2538
	15	5482	3692	0	0.198	1063	0.013	0.086	0.335	9844	15720	5865	9312	2998
	16	58098	12835	0	0.164	0.916	0.004	0.090	0.217	8396	12340	6273	8024	1452
	17	7946	4846	0	0.074	0.112	0.037	0.112	0.053	8078	8319	7862	8053	0.187
	18	16230	13028	0	0.052	0.101	0.018	0.050	0.021	7413	10799	5785	7393	1236
	19	9135	5156	0	0.082	0.182	0.010	0.083	0.053	8115	10752	5844	7968	1106
	20	4160	5130	0	0.091	0.137	0.034	0.092	0.035	9244	14450	6545	8243	2344
	21	3033	6448	0	0.117	0.354	0.014	0.108	0.077	13939	27811	5769	14241	5050
	22	12049	6537	0	0.149	0.978	0.013	0.079	0.243	9489	14060	5790	9364	2160
	23	43375	13702	0	0.249	0.790	0.022	0.127	0.284	11034	14942	7616	11278	2145
	24	46369	14264	0	0.140	0.545	0.012	0.127	0.114	9296	15542	6021	8956	2488
	25	72117	14639	0	0.154	0.439	0.026	0.142	0.099	10009	18554	6209	9323	3478
	26	6304	6949	0	0.087	0.207	0.009	0.069	0.051	8919	20658	5912	8072	3131
	27	32174	13649	0	0.098	0.200	0.008	0.095	0.053	12175	19254	6763	12371	2692
	28	15420	7246	0	0.106	0.233	0.019	0.140	0.101	7536	8204	6430	7563	0.646
	29	78508	8102	0	0.195	0.285	0.094	0.205	0.096	6933	7726	6500	6771	0.469
	30	23315	15173	0	0.090	0.191	0.014	0.088	0.056	7696	10399	5739	7213	1428
	31	30548	8688	0	0.088	0.138	0.025	0.118	0.051	8940	13312	6347	7629	2634
	32	24370	8637	0	0.083	0.355	0.010	0.066	0.078	8238	14873	5744	7324	2654
	33	7247	10068	0	0.116	0.462	0.012	0.101	0.094	12881	20574	5663	12728	4119
	34	33898	9385	0	0.101	0.216	0.028	0.091	0.054	9303	13462	5735	9297	2063
	35	79528	16252	0	0.170	0.184	0.156	0.184	0.020	6713	7782	6173	6185	0.756
	36	69627	9541	0	0.153	0.291	0.021	0.167	0.092	6530	7746	5881	6398	0.592
	37	41048	9561	0	0.090	0.170	0.041	0.059	0.070	8628	11866	5993	10139	2459
	38	68572	18305	0	0.130	0.352	0.018	0.105	0.100	12249	20436	5806	12727	4040
	39	10997	10073	0	0.109	0.318	0.004	0.102	0.079	8779	21305	5680	7146	3965
	40	78319	9864	0	0.097	0.335	0.015	0.091	0.059	11265	18310	5668	12068	3729
	41	39681	9615	0	0.071	0.128	0.022	0.066	0.038	8218	11118	6307	8777	1586
	42	18358	9572	0	0.197	0.223	0.151	0.218	0.041	7195	8335	6219	7885	0.929
	43	51241	10093	0	0.154	0.315	0.054	0.146	0.083	6655	9556	5736	6315	1092
	44	0.670	1860	0	0.121	1089	0.000	0.047	0.201	8190	14455	5701	7591	2392
	45	49679	13255	0	0.241	0.422	0.087	0.215	0.169	7818	11206	5844	7474	2039
	46	52224	13037	0	0.353	0.353	0.353	0.353	NaN	7737	8417	7058	8417	0.680
	47	0.000	6748	0	0.142	0.142	0.142	0.142	NaN	6206	6241	6170	6241	0.036
	48	47991	9627	0	0.086	0.086	0.086	0.086	NaN	6961	7319	6603	7319	0.358
	49	63494	9680	0	0.107	0.107	0.107	0.107	NaN	6580	7532	5628	7532	0.952
	50	14574	9473	0	0.184	0.528	0.012	0.164	0.123	9607	17266	7003	9243	1997
	51	29480	10276	0	0.118	1051	0.006	0.080	0.180	8263	18682	5633	7323	3261
	52	47391	18872	0	0.067	0.093	0.026	0.072	0.026	6161	7468	5648	5975	0.638
	53	62526	11818	0	0.196	0.509	0.072	0.122	0.210	7435	8519	5787	7674	0.903
	54	20903	15561	0	0.095	0.205	0.024	0.092	0.056	12015	16305	6531	12529	2736
	55	38704	11979	0	0.103	0.345	0.013	0.094	0.066	8818	15727	5750	7911	2669
	56	82354	9671	0	0.158	0.285	0.000	0.190	0.145	7472	8483	6249	7855	0.821
	57	62459	11605	0	0.209	0.844	0.014	0.150	0.237	7926	11039	5680	7542	2024
	58	1147	4254	0	0.304	0.532	0.028	0.344	0.206	8836	15635	6229	7725	3019
	59	20683	7619	0	0.055	0.055	0.055	0.055	NaN	6542	6584	6499	6584	0.042
	60	1874	2077	0	0.094	0.139	0.034	0.104	0.035	6503	8323	5690	6330	0.803
	61	74751	9159	0	0.081	0.160	0.033	0.088	0.058	7075	7690	6470	7062	0.386
	62	65724	11296	0	0.064	0.064	0.064	0.064	NaN	5945	6022	5868	6022	0.077
	63	60887	11559	0	0.150	1022	0.021	0.071	0.258	8006	14252	5826	6998	2224
	64	73040	11799	0	0.048	0.048	0.048	0.048	NaN	7227	7484	6970	7484	0.257
	65	46218	12352	0	0.367	1047	0.113	0.188	0.389	7938	12592	5880	7871	2338
	66	12108	6388	0	0.046	0.082	0.006	0.051	0.038	6405	6597	6151	6595	0.196
	67	28038	14519	0	0.067	0.104	0.022	0.099	0.041	6635	6887	6282	6768	0.227
	68	80181	18953	0	0.071	0.189	0.012	0.066	0.037	12222	25121	5805	11349	4905
	69	43858	17018	0	0.334	0.442	0.180	0.379	0.137	10083	13865	6515	11389	2786
	70	9452	8275	0	0.169	0.344	0.061	0.096	0.121	6451	7356	5990	6343	0.443
	71	82269	7861	0	0.188	0.231	0.142	0.190	0.044	6083	6627	5707	6261	0.384
	72	61905	13520	0	0.131	0.349	0.012	0.094	0.110	8155	12884	6005	7354	1797
	73	31700	11274	0	0.048	0.096	0.017	0.048	0.029	6466	7613	5801	6421	0.558
	74	16961	9647	0	0.023	0.030	0.018	0.021	0.006	6666	6827	6396	6793	0.170
	75	6870	3716	0	0.054	0.077	0.032	0.053	0.023	7441	9521	6171	7118	1253
	76	48991	13080	0	0.148	0.519	0.009	0.101	0.138	7318	10169	5617	6858	1333
	77	1338	4363	0	0.058	0.058	0.058	0.058	NaN	7204	7681	6727	7681	0.477
	78	69514	18511	0	0.090	0.247	0.019	0.065	0.068	7113	8826	6268	6917	0.604
	79	78037	16425	0	0.097	0.097	0.097	0.097	NaN	7046	7993	6100	7993	0.947
	80	21755	11390	0	0.082	0.159	0.014	0.083	0.037	9174	14387	5819	8925	1980
	81	46579	14087	0	0.136	0.252	0.039	0.153	0.070	7719	11464	6122	7370	1529
	82	72108	14570	0	0.068	0.087	0.049	0.087	0.027	6379	7171	5694	6271	0.608
	83	9384	5197	0	0.079	0.127	0.044	0.067	0.034	6213	6572	5649	6328	0.289
	84	31915	11135	0	0.110	0.110	0.110	0.110	NaN	6298	6973	5624	6973	0.674
	85	47008	18694	0	0.092	0.245	0.020	0.085	0.063	9108	12897	5959	9060	1836
	86	58112	12748	0	0.092	0.094	0.091	0.094	0.002	8068	10719	5909	7575	1994
	87	35027	9991	0	0.085	0.284	0.018	0.080	0.063	7352	9249	5663	7730	0.989
	88	43825	16598	0	0.129	0.170	0.087	0.170	0.059	7974	8611	6724	8586	0.884
	89	31268	8785	0	0.079	0.079	0.079	0.079	NaN	6125	6176	6074	6176	0.051
	90	0.143	8846	0	0.050	0.190	0.000	0.039	0.063	8910	17011	5813	7558	3155
	91	39522	14126	0	0.098	0.267	0.027	0.071	0.077	7384	8772	5930	7447	0.842
	92	76334	11879	0	0.199	0.289	0.108	0.289	0.128	6722	7463	6130	6573	0.554
	93	21406	15776	0	0.118	0.400	0.011	0.091	0.089	8083	12844	5683	7566	1765
	94	82354	8879	0	0.032	0.095	0.000	0.047	0.038	6995	9061	6019	6536	1013
	95	29032	13188	0	0.070	0.221	0.013	0.064	0.039	9446	13667	6114	9416	2029
	96	26123	11810	0	0.118	0.155	0.081	0.155	0.052	6646	7118	5724	7097	0.652
	97	23630	15106	0	0.091	0.137	0.035	0.132	0.051	6501	7795	5621	6521	0.730
	98	9777	5100	0	0.044	0.054	0.034	0.054	0.014	6080	6577	5705	5959	0.366
	99	58255	11658	0	0.061	0.168	0.005	0.064	0.038	6978	8926	5631	6895	0.793
	100	12637	7460	0	0.089	0.146	0.026	0.087	0.039	6081	6928	5729	6061	0.290
	101	14768	10702	0	0.102	0.486	0.012	0.070	0.108	7315	10058	5679	6939	1188
	102	63812	13110	0	0.075	0.125	0.005	0.081	0.042	6501	7965	5678	6476	0.640
	103	47111	18408	0	0.167	0.380	0.039	0.162	0.094	9540	16261	5943	8246	3371
	104	72460	14836	0	0.145	0.264	0.066	0.106	0.105	6126	6743	5621	6196	0.411
	105	80035	12680	0	0.195	0.397	0.010	0.221	0.149	6118	6272	5985	6090	0.103
	106	28000	10025	0	0.083	0.207	0.003	0.066	0.054	7240	10021	5654	7064	1132
	107	66561	11802	0	0.096	0.096	0.096	0.096	NaN	6265	6565	5964	6565	0.301
	108	35311	9749	0	0.076	0.114	0.040	0.108	0.041	6383	6591	5979	6478	0.212
	109	78478	19710	0	0.067	0.157	0.013	0.070	0.040	7796	11210	5860	7306	1802
	110	43517	16778	0	0.206	0.252	0.146	0.221	0.055	8017	9300	5948	8773	1275
	111	43208	13530	0	0.147	0.222	0.084	0.185	0.067	8004	13847	5758	7136	2989
	112	17264	12599	0	0.431	0.443	0.420	0.443	0.016	8215	10229	5862	8555	1799
	113	47539	12156	0	0.133	0.252	0.053	0.095	0.105	6377	6712	5824	6619	0.345
	114	70796	12885	0	0.158	0.158	0.158	0.158	NaN	5825	6003	5647	6003	0.178
	115	25630	8915	0	0.046	0.046	0.046	0.046	NaN	6955	7579	6330	7579	0.625
	116	64119	12641	0	0.172	0.365	0.020	0.140	0.137	6603	7803	5631	6652	0.706
	117	82354	11593	0	0.257	1044	0.024	0.142	0.389	7216	7776	6219	7208	0.508
	118	35120	9912	0	0.089	0.089	0.089	0.089	NaN	6460	7085	5835	7085	0.625
	119	12461	8126	0	0.087	0.165	0.047	0.067	0.050	6224	6868	5735	6249	0.361
	120	42862	16249	0	0.041	0.041	0.041	0.041	NaN	5891	5913	5868	5913	0.022
	121	3138	10202	0	0.053	0.086	0.021	0.086	0.046	6273	6460	5916	6443	0.253
	122	23644	11691	0	0.134	0.219	0.096	0.107	0.051	6462	8337	5819	6312	0.862
	123	0.853	8415	0	0.049	0.088	0.023	0.036	0.034	6538	7124	6031	6864	0.467
	124	69917	17215	0	0.135	0.161	0.111	0.141	0.021	9961	14809	6661	8509	3088
	125	26720	11349	0	0.115	0.191	0.067	0.089	0.066	7119	7807	6329	7449	0.561
	126	49549	13118	0	0.097	0.097	0.097	0.097	NaN	6384	6792	5976	6792	0.408
	127	21821	15889	0	0.100	0.100	0.100	0.100	NaN	6271	6781	5762	6781	0.510
	0	1712	14568	0	0.116	0.193	0.035	0.126	0.053	6557	10255	4949	5792	1631
	1	71735	15227	0	0.057	0.114	0.020	0.055	0.038	5313	6248	4717	5309	0.498
	2	64585	15048	0	0.123	0.331	0.015	0.117	0.073	8539	17038	5049	7698	2854
	3	34634	16641	0	0.098	0.247	0.008	0.087	0.064	9782	18747	4913	9188	3945
	4	28090	15293	0	0.078	0.164	0.008	0.076	0.041	8321	20742	4723	6536	3990
	5	22231	16294	0	0.078	0.157	0.007	0.075	0.039	11603	21694	4801	10874	4840
	6	81097	18120	0	0.085	0.140	0.030	0.108	0.047	5926	7028	4712	5929	0.653
	7	2249	1989	0	0.056	0.184	0.008	0.052	0.036	9558	22989	4726	7586	4769
	8	5499	2784	0	0.062	0.106	0.036	0.055	0.030	5910	6889	5218	5734	0.605
	9	0.000	1258	0	0.031	0.095	0.000	0.048	0.030	5687	7167	4985	5742	0.658
	10	6077	3506	0	0.408	0.736	0.003	0.626	0.337	5242	6167	4751	5013	0.507
	11	8286	3242	0	0.060	0.152	0.008	0.048	0.037	7052	12759	4729	6027	2402
	12	11409	3692	0	0.098	0.275	0.009	0.086	0.065	6468	9590	4811	5909	1481
	13	16337	4653	0	0.044	0.087	0.017	0.046	0.023	8441	11554	5037	9142	2218
	14	12541	20797	0	0.045	0.110	0.006	0.042	0.027	10196	23184	4840	9091	4838
	15	31760	4986	0	0.037	0.129	0.004	0.025	0.034	6233	9598	4846	6021	1023
	16	50232	21058	0	0.054	0.183	0.012	0.050	0.035	6973	10119	4864	6684	1335
	17	23694	5153	0	0.086	0.196	0.017	0.082	0.048	5837	6728	4756	5985	0.543
	18	77622	5209	0	0.113	0.331	0.003	0.064	0.133	6769	8988	4998	6343	1605
	19	18318	4980	0	0.093	0.175	0.012	0.101	0.053	5196	6525	4780	5081	0.527
	20	2844	5519	0	0.030	0.046	0.018	0.026	0.012	5833	7351	4845	5801	0.898
	21	55497	21759	0	0.044	0.103	0.014	0.041	0.024	9774	19033	5181	8962	3654
	22	74701	5210	0	0.064	0.126	0.026	0.067	0.032	6725	9119	4843	6875	1538
	23	25082	5317	0	0.218	0.772	0.019	0.149	0.234	6216	8579	4850	6189	1049
	24	58234	5520	0	0.063	0.127	0.002	0.071	0.028	6778	10062	4757	6508	1397
	25	35664	5709	0	0.129	0.249	0.039	0.102	0.072	6296	7869	5001	6436	0.800
	26	61567	6168	0	0.072	0.112	0.041	0.063	0.036	6664	7308	5360	7167	0.773
	27	45521	5877	0	0.248	1036	0.032	0.099	0.357	6164	9513	4761	5676	1451
	28	28690	6063	0	0.103	0.264	0.024	0.099	0.077	6263	8208	4895	6073	0.987
	29	12932	6060	0	0.040	0.095	0.002	0.035	0.023	8014	15558	4776	6562	2750
	30	69097	6335	0	0.073	0.340	0.010	0.059	0.057	6641	12130	4770	6099	1720
	31	9362	6839	0	0.073	0.193	0.002	0.075	0.048	8358	12999	4841	8934	2093
	32	51171	6373	0	0.107	0.147	0.057	0.097	0.037	6850	8435	6020	6973	0.716
	33	7511	6280	0	0.059	0.130	0.007	0.058	0.033	6484	13455	4735	5762	2246
	34	26324	6187	0	0.065	0.160	0.015	0.058	0.034	7288	13404	4755	6407	2257
	35	72191	6921	0	0.054	0.182	0.005	0.049	0.034	8564	17122	4852	8260	2549
	36	24579	7157	0	0.057	0.139	0.011	0.045	0.038	6230	8682	4730	5535	1284
	37	52233	7353	0	0.106	0.234	0.013	0.102	0.061	6637	11510	4716	6266	1419
	38	18686	8518	0	0.063	0.179	0.008	0.051	0.040	6142	10760	4747	5884	1264
	39	30955	8369	0	0.145	0.403	0.012	0.110	0.111	6388	9393	4782	5879	1397
	40	66253	7793	0	0.086	0.302	0.003	0.074	0.062	6625	13301	4826	6038	2141
	41	62065	8309	0	0.074	0.147	0.045	0.054	0.049	6755	7389	6086	6934	0.499
	42	20850	9468	0	0.120	0.414	0.009	0.103	0.086	6225	8837	4782	6021	1037
	43	40561	8367	0	0.052	0.115	0.018	0.050	0.024	7526	9864	5260	7761	1613
	44	55917	8407	0	0.041	0.077	0.013	0.041	0.024	8730	11973	5192	8538	1692
	45	14265	9578	0	0.063	0.151	0.006	0.059	0.038	6961	10330	4764	6641	1413
	46	34435	9621	0	0.059	0.195	0.007	0.048	0.043	8869	20473	4835	6888	4229
	47	30838	9705	0	0.091	0.139	0.022	0.094	0.043	6390	8337	5101	6081	1153
	48	43186	9934	0	0.041	0.087	0.007	0.040	0.019	13215	25616	4811	12291	5848
	49	55529	11114	0	0.060	0.170	0.009	0.059	0.036	6897	13265	4878	6220	2068
	50	71909	11956	0	0.060	0.114	0.023	0.058	0.027	6811	9253	5105	6700	1297
	51	56750	11580	0	0.082	0.152	0.027	0.069	0.051	6639	10356	4841	6393	1697
	52	31395	13370	0	0.064	0.206	0.004	0.060	0.039	10900	53789	4794	8476	8297
	53	63504	11297	0	0.085	0.279	0.005	0.062	0.064	8512	23188	5262	7281	3502
	54	19470	14876	0	0.130	0.439	0.029	0.094	0.105	7443	9695	5256	7246	1054
	55	59161	13314	0	0.091	0.129	0.032	0.121	0.044	5878	6526	5015	6185	0.640
	56	79348	7132	0	0.061	0.072	0.035	0.071	0.017	6895	9143	4824	6682	1481
	57	0.126	7340	0	0.184	0.721	0.048	0.143	0.208	7230	10871	4962	6917	1821
	58	75900	9668	0	0.115	0.176	0.055	0.176	0.085	7177	8238	6141	7151	0.857
	59	12653	9245	0	0.246	0.246	0.246	0.246	NaN	6118	7229	5008	7229	1110
	60	0.388	12075	0	0.430	0.430	0.430	0.430	NaN	6635	7602	5668	7602	0.967
	61	28884	12039	0	0.150	0.157	0.144	0.157	0.009	5810	6858	4833	5739	0.828
	62	81168	5058	0	0.117	0.117	0.117	0.117	NaN	5153	5530	4775	5530	0.377
	63	62129	5792	0	0.192	0.916	0.030	0.101	0.295	6147	6679	5488	6162	0.398
	64	10064	21194	0	0.043	0.074	0.030	0.034	0.021	5741	6911	4826	5815	0.816
	65	20748	22809	0	0.039	0.039	0.039	0.039	NaN	4944	5064	4823	5064	0.121
	66	46872	5425	0	0.087	0.131	0.046	0.083	0.042	5152	5553	4806	5226	0.275
	67	57869	7367	0	0.053	0.133	0.006	0.054	0.049	5238	5765	4743	5200	0.331
	68	46473	9273	0	0.079	0.121	0.035	0.091	0.030	6355	7283	5445	6342	0.616
	69	1512	9942	0	0.074	0.200	0.017	0.057	0.049	6079	7596	4822	6102	0.803
	70	78684	9588	0	0.064	0.108	0.007	0.084	0.043	5443	5871	5211	5321	0.249
	71	63045	5273	0	0.058	0.081	0.028	0.067	0.028	5191	5434	4902	5341	0.210
	72	22008	8231	0	0.066	0.100	0.032	0.100	0.048	5274	5382	5126	5314	0.108
	73	16310	4578	0	0.059	0.089	0.002	0.086	0.049	5172	5847	4850	5138	0.407
	74	40923	11357	0	0.055	0.216	0.004	0.029	0.080	5635	6939	4842	5371	0.682
	75	58270	5420	0	0.040	0.100	0.013	0.039	0.032	5084	5559	4866	4938	0.253
	76	22333	18490	0	0.120	0.120	0.120	0.120	NaN	4987	5175	4799	5175	0.188
	77	6672	9964	0	0.117	0.233	0.023	0.089	0.073	6571	8143	5471	6643	0.774
	78	71721	11875	0	0.043	0.043	0.043	0.043	NaN	4993	5113	4873	5113	0.120
	79	55221	21605	0	0.005	0.005	0.005	0.005	NaN	4747	4764	4729	4764	0.017
	80	41324	10312	0	0.100	0.244	0.018	0.095	0.060	8297	11550	5152	8645	1853
	81	51762	7829	0	0.109	0.117	0.101	0.117	0.012	5040	5438	4801	4881	0.284
	82	71766	6447	0	0.048	0.111	0.006	0.047	0.025	6129	7451	4866	6128	0.722
	83	48096	20366	0	0.049	0.110	0.012	0.024	0.054	7271	8114	6192	7506	0.695
	84	59360	18057	0	0.093	0.220	0.020	0.089	0.045	5873	7891	4885	5741	0.927
	85	6404	16206	0	0.152	0.152	0.152	0.152	NaN	4913	5036	4789	5036	0.124
	86	6180	18875	0	0.086	0.234	0.028	0.067	0.062	5201	6107	4788	5136	0.307
	87	21671	20627	0	0.086	0.198	0.019	0.069	0.050	6119	7475	4920	6003	0.879
	88	22117	17555	0	0.137	0.374	0.028	0.131	0.097	6688	8977	4992	6748	1186
	89	46794	16578	0	0.067	0.224	0.012	0.051	0.059	6206	7137	4993	6228	0.551
	90	12587	19983	0	0.062	0.062	0.062	0.062	NaN	5024	5281	4767	5281	0.257
	0	40904	1302	0	0.027	0.027	0.027	0.027	NaN	4853	5520	4187	5520	0.667
	1	77461	17262	0	0.068	0.192	0.004	0.056	0.039	5338	7274	4160	5331	0.764
	2	34617	1574	0	0.036	0.071	0.004	0.032	0.021	5480	7590	4203	5443	1020
	3	48418	17435	0	0.124	0.306	0.049	0.115	0.071	6158	9859	4195	5733	1801
	4	69507	0.926	0	0.241	0.737	0.046	0.134	0.283	5480	6336	4383	5777	0.786
	5	56121	1162	0	0.053	0.150	0.004	0.052	0.038	5938	8268	4147	5928	1074
	6	56971	17903	0	0.159	0.412	0.039	0.072	0.161	7271	13214	4435	6606	3087
	7	77642	1676	0	0.052	0.214	0.004	0.046	0.036	6557	13393	4092	5810	2336
	8	72079	1936	0	0.036	0.099	0.007	0.029	0.025	8957	11951	4557	9790	2241
	9	79810	17601	0	0.053	0.152	0.001	0.050	0.029	6628	9054	4217	6626	0.878
	10	58651	3040	0	0.051	0.058	0.043	0.058	0.011	4991	5599	4131	5242	0.625
	11	74543	17860	0	0.066	0.246	0.005	0.057	0.045	5865	7775	4199	5855	0.707
	12	45039	2920	0	0.031	0.059	0.019	0.027	0.018	5759	6595	5489	5585	0.421
	13	54607	3238	0	0.047	0.112	0.009	0.038	0.033	6324	9655	4264	6164	1627
	14	21062	3080	0	0.077	0.147	0.014	0.067	0.052	5062	6312	4261	4921	0.564
	15	32209	3311	0	0.042	0.120	0.007	0.037	0.028	8485	14261	4303	7876	2921
	16	3747	3475	0	0.087	0.347	0.008	0.071	0.069	5752	10038	4114	5397	1420
	17	24926	2977	0	0.387	0.656	0.146	0.591	0.275	5094	6177	4268	4953	0.705
	18	19852	18633	0	0.038	0.848	0.002	0.023	0.093	4826	6562	4104	4694	0.526
	19	17548	18923	0	0.032	0.080	0.007	0.029	0.015	7969	10370	5283	8030	0.899
	20	59966	3945	0	0.242	1044	0.015	0.114	0.399	5002	7041	4115	4841	0.894
	21	9346	3627	0	0.214	0.634	0.028	0.144	0.240	4469	5041	4140	4464	0.294
	22	12950	4130	0	0.169	0.326	0.069	0.163	0.083	5442	7127	4308	5526	0.986
	23	11392	18870	0	0.041	0.087	0.005	0.039	0.020	4740	6698	4101	4583	0.520
	24	15945	4040	0	0.165	0.782	0.010	0.074	0.248	5466	7777	4144	5479	1046
	25	73252	6381	0	0.113	0.343	0.006	0.094	0.090	5732	9172	4191	5342	1355
	26	33896	5020	0	0.042	0.115	0.011	0.030	0.035	5670	7926	4273	5987	1059
	27	56720	4470	0	0.070	0.129	0.012	0.042	0.054	4971	5652	4460	4908	0.450
	28	10766	6295	0	0.070	0.166	0.005	0.054	0.045	5115	9417	4128	4745	1195
	29	68060	6785	0	0.049	0.116	0.003	0.036	0.028	8054	15831	4323	7630	3208
	30	37122	7147	0	0.223	0.308	0.139	0.308	0.120	6169	6494	5852	6161	0.262
	31	72823	7395	0	0.120	0.317	0.011	0.116	0.104	6286	9571	4103	6535	1713
	32	0.034	5529	0	0.076	0.370	0.000	0.048	0.084	6201	9502	4173	6254	1446
	33	69736	8483	0	0.128	0.335	0.033	0.115	0.094	5210	6024	4329	5213	0.568
	34	40687	8729	0	0.117	0.209	0.034	0.112	0.059	7170	10257	4374	6838	1820
	35	34712	7397	0	0.043	0.108	0.019	0.041	0.020	7730	16572	4175	6473	3574
	36	19634	8180	0	0.056	0.153	0.008	0.048	0.032	7654	19689	4086	6206	3879
	37	15108	8008	0	0.084	0.333	0.015	0.065	0.063	6691	16659	4095	5792	2769
	38	6643	9476	0	0.092	0.327	0.009	0.077	0.061	7293	19702	4115	5812	4011
	39	55970	8460	0	0.046	0.084	0.009	0.052	0.027	5000	6157	4235	5080	0.645
	40	62027	9757	0	0.063	0.154	0.008	0.064	0.040	9110	20982	4199	7476	4397
	41	12839	10091	0	0.071	0.122	0.040	0.066	0.029	5157	6104	4162	4906	0.674
	42	23176	10198	0	0.104	0.277	0.029	0.098	0.055	5558	8035	4095	5151	1144
	43	48863	12394	0	0.101	0.353	0.007	0.072	0.090	9192	17542	4189	8382	3447
	44	10778	10654	0	0.074	0.213	0.009	0.055	0.064	5479	8844	4169	4994	1422
	45	47083	9260	0	0.144	0.382	0.017	0.150	0.095	9168	21086	4160	6938	4776
	46	12765	13847	0	0.127	0.289	0.039	0.113	0.079	8002	11353	4253	7554	2282
	47	40017	12511	0	0.075	0.290	0.008	0.061	0.062	5213	6448	4179	4891	0.739
	48	64989	12129	0	0.087	0.253	0.007	0.080	0.051	6962	14004	4144	5941	2695
	49	27574	13353	0	0.086	0.341	0.006	0.076	0.072	5788	8322	4233	5656	1213
	50	41493	15772	0	0.081	0.259	0.003	0.069	0.055	8757	26352	4104	6672	5850
	51	76006	0.000	0	0.043	0.095	0.000	0.048	0.039	6464	10366	4247	6438	1270
	52	81921	0.000	0	0.000	0.000	0.000	0.000	0.000	5803	7417	4233	5751	0.958
	53	31524	0.000	0	0.048	0.048	0.048	0.048	4.907e-15	4271	4450	4109	4253	0.140
	54	8654	14680	0	0.085	0.232	0.003	0.076	0.053	8363	16934	4252	7346	3889
	55	67910	0.300	0	0.196	0.841	0.022	0.135	0.210	5221	7585	4081	4998	0.871
	56	73866	0.065	0	0.074	1024	0.000	0.048	0.129	7858	11917	4379	7580	1735
	57	63547	15715	0	0.094	0.164	0.024	0.164	0.099	6681	6977	6293	6772	0.287
	58	47211	1014	0	0.070	0.142	0.021	0.072	0.029	6821	11546	4231	6396	1875
	59	61191	1139	0	0.243	0.669	0.012	0.135	0.209	5659	9026	4087	5542	1167
	60	50950	1001	0	0.101	0.310	0.020	0.066	0.078	4860	5776	4127	5028	0.513
	61	58186	1012	0	0.095	0.814	0.009	0.058	0.152	5762	8874	4157	5423	1337
	62	17227	16152	0	0.204	0.341	0.027	0.282	0.131	5228	6900	4274	5026	0.819
	63	51917	7469	0	0.349	0.349	0.349	0.349	NaN	4150	4158	4142	4158	0.008
	64	60965	16576	0	0.042	0.070	0.011	0.045	0.030	6864	8994	5782	6754	1285
	65	25293	3288	0	0.166	0.334	0.098	0.121	0.112	5086	5892	4492	5053	0.509
	66	4907	7199	0	0.093	0.221	0.008	0.082	0.067	7294	10786	4217	7361	1751
	67	68920	11560	0	0.107	0.108	0.106	0.108	0.001	4414	4502	4294	4446	0.088
	68	45083	15019	0	0.062	0.113	0.028	0.073	0.040	4667	5040	4360	4576	0.282
	69	54495	10562	0	0.053	0.053	0.053	0.053	NaN	4992	5440	4543	5440	0.449
	70	64736	1100	0	0.167	0.307	0.038	0.155	0.135	4493	4683	4163	4655	0.207
	71	39848	10204	0	0.040	0.040	0.040	0.040	NaN	4737	4835	4639	4835	0.098
	72	17196	3254	0	0.072	0.072	0.072	0.072	NaN	4745	4929	4561	4929	0.184
	73	18360	5263	0	0.045	0.071	0.009	0.055	0.026	5157	5771	4494	5425	0.539
	74	42824	5356	0	0.081	0.081	0.081	0.081	NaN	4471	4718	4224	4718	0.247
	75	44675	3725	0	0.112	0.112	0.112	0.112	NaN	4237	4388	4087	4388	0.150
	76	42474	17769	0	0.005	0.005	0.005	0.005	NaN	4450	4496	4403	4496	0.046
	77	70329	0.639	0	1088	1088	1088	1088	NaN	5135	5179	5092	5179	0.043
	78	69100	19809	0	0.067	0.362	0.000	0.048	0.089	4613	5995	4085	4573	0.404
	79	43043	13860	0	0.059	0.112	0.017	0.051	0.031	4735	5649	4164	4581	0.478
	80	61539	1093	0	0.373	0.624	0.083	0.410	0.272	4461	4702	4247	4497	0.165
	81	70523	10572	0	0.184	0.284	0.095	0.166	0.089	4604	4960	4275	4679	0.240
	82	18970	15144	0	0.058	0.135	0.007	0.062	0.032	4932	6427	4153	4774	0.601
	83	76776	12029	0	0.084	0.119	0.048	0.119	0.050	4743	4879	4603	4747	0.113
	84	54846	3107	0	0.037	0.061	0.009	0.042	0.021	4463	4980	4142	4358	0.292
	85	74029	0.046	0	0.168	1060	0.000	0.048	0.300	4918	6473	4116	4894	0.617
	86	68899	6164	0	0.195	0.307	0.045	0.259	0.116	4730	5150	4101	4804	0.385
	87	13663	8269	0	0.070	0.164	0.014	0.081	0.044	4828	6829	4229	4694	0.645
	88	68275	0.000	0	0.082	0.190	0.011	0.095	0.059	4551	5144	4193	4443	0.313
	89	11307	6346	0	0.151	0.215	0.090	0.149	0.062	4485	4713	4156	4658	0.221
	90	1684	11614	0	0.125	0.125	0.125	0.125	NaN	4169	4188	4150	4188	0.019
	91	49297	15343	0	0.116	0.287	0.009	0.128	0.081	7364	9594	4494	7213	1294
	92	71939	0.000	0	0.000	0.000	0.000	0.000	NaN	4559	4930	4188	4930	0.371
	93	64356	13619	0	0.133	0.268	0.050	0.098	0.085	4536	4949	4081	4580	0.312
	94	40124	17035	0	0.080	0.080	0.080	0.080	NaN	4276	4450	4102	4450	0.174
	95	20190	18494	0	0.020	0.022	0.018	0.022	0.003	4701	4871	4398	4834	0.215
	96	12947	4125	0	0.329	0.329	0.329	0.329	NaN	4511	4865	4156	4865	0.354
	posterior / RNAi
	0	2288	2385	0	0.028	0.038	0.017	0.029	0.009	10306	11238	9271	10763	0.735
	1	25643	13995	0	0.044	0.082	0.008	0.049	0.027	14292	18568	9317	14494	2504
	2	51070	13041	0	0.071	0.194	0.026	0.060	0.061	11567	14558	9521	10995	1886
	3	10650	14456	0	0.053	0.136	0.009	0.049	0.035	10877	13695	9259	10749	1181
	4	20976	15000	0	0.050	0.113	0.003	0.042	0.030	15487	30990	9486	13069	6072
	5	39733	14597	0	0.035	0.077	0.007	0.029	0.023	12281	17121	9685	11388	2369
	6	3343	6374	0	0.046	0.120	0.001	0.039	0.024	16186	34772	9221	14429	5573
	7	19432	16023	0	0.061	0.146	0.007	0.036	0.051	12278	14841	9180	13561	1912
	8	79215	7295	0	0.102	0.764	0.005	0.063	0.138	12635	23075	9005	10939	3743
	9	12111	16712	0	0.057	0.173	0.007	0.049	0.036	17877	37633	9211	15262	8121
	10	77522	7584	0	0.072	0.189	0.018	0.070	0.038	14842	26356	10097	13573	4640
	11	36871	17183	0	0.063	0.221	0.4863	0.058	0.047	13396	29308	9106	11522	4705
	12	77174	18090	0	0.035	0.085	0.004	0.032	0.018	16896	47169	9769	13132	8270
	13	2192	9397	0	0.082	0.299	0.003	0.059	0.070	11608	20383	9018	10647	2845
	14	62769	18900	0	0.042	0.084	0.015	0.037	0.021	13275	17236	10049	13720	2472
	15	65564	18972	0	0.038	0.081	0.005	0.037	0.019	17783	40671	9019	14729	7710
	16	45338	19897	0	0.049	0.107	0.011	0.046	0.027	15683	26291	9944	15478	4219
	17	71121	19981	0	0.032	0.085	0.001	0.028	0.019	17092	43040	8997	13925	8825
	18	73590	19516	0	0.034	0.097	0.002	0.031	0.019	14895	35567	8987	11190	7205
	19	57446	19351	0	0.039	0.111	0.005	0.036	0.022	16817	41312	9714	13584	7484
	20	39229	20579	0	0.040	0.082	0.9921	0.040	0.020	19990	40165	9262	17558	8326
	21	7686	11178	0	0.090	0.373	0.006	0.070	0.072	17539	41617	10189	15149	7523
	22	54487	10224	0	0.056	0.089	0.022	0.053	0.019	12270	16770	9202	11420	2426
	23	42294	20553	0	0.039	0.089	0.009	0.034	0.024	18302	42745	9019	15063	8711
	24	76351	11052	0	0.046	0.085	0.006	0.044	0.026	12785	22723	9079	11250	4107
	25	24201	20745	0	0.032	0.085	0.006	0.031	0.017	17448	52587	9089	13377	9948
	26	55584	20997	0	0.033	0.111	0.004	0.025	0.022	16224	28601	9070	15997	5276
	27	28184	20650	0	0.049	0.124	0.003	0.043	0.032	17856	58352	9137	13065	10044
	28	34816	20939	0	0.042	0.078	0.011	0.039	0.019	11783	15594	9449	11565	1895
	29	70650	11753	0	0.082	0.082	0.082	0.082	NaN	9832	10184	9480	10184	0.352
	30	21406	21495	0	0.034	0.094	0.012	0.031	0.020	15086	23376	9209	14265	4312
	31	66446	21052	0	0.054	0.061	0.035	0.060	0.010	11817	14327	9785	11989	1606
	32	53845	21176	0	0.068	0.989	0.009	0.039	0.155	14064	23712	9040	12111	4451
	33	39973	12024	0	0.052	0.091	0.011	0.063	0.034	10527	12003	9490	10369	0.903
	34	51024	22731	0	0.070	0.097	0.045	0.069	0.026	13188	14942	10966	14291	1552
	35	22951	12962	0	0.046	0.112	0.004	0.051	0.035	13912	21380	9610	12225	3625
	36	47277	22174	0	0.043	0.105	0.008	0.038	0.025	17044	33665	9122	15489	6675
	37	16627	18689	0	0.063	0.063	0.063	0.063	NaN	11898	12477	11320	12477	0.578
	38	14441	14872	0	0.034	0.034	0.034	0.034	NaN	10135	10458	9812	10458	0.323
	39	64444	17128	0	0.032	0.032	0.032	0.032	NaN	9489	9749	9229	9749	0.260
	40	17856	11262	0	0.052	0.052	0.052	0.052	NaN	9423	9775	9070	9775	0.353
	41	50180	22614	0	0.122	0.515	0.005	0.046	0.161	10720	13453	9104	10542	1352
	42	38981	19191	0	0.131	0.935	0.011	0.077	0.236	9887	11054	9067	9863	0.594
	43	50647	22514	0	0.051	0.067	0.024	0.062	0.023	9757	10501	9360	9757	0.456
	44	38762	20207	0	0.039	0.039	0.039	0.039	NaN	9863	10332	9395	10332	0.469
	0	21051	18124	0	0.044	0.105	0.000	0.052	0.029	14910	21350	8814	15800	4184
	1	72794	13680	0	0.048	0.163	0.005	0.042	0.030	13687	25238	8298	11791	4673
	2	58141	13245	0	0.034	0.088	0.003	0.032	0.019	13246	20286	9397	12562	2612
	3	80302	7686	0	0.042	0.112	0.012	0.037	0.022	12482	17993	8446	12480	2687
	4	22822	13604	0	0.113	0.584	0.006	0.080	0.126	16387	23682	11127	16058	3384
	5	3054	13994	0	0.046	0.117	0.005	0.039	0.026	11300	14926	8656	11307	1449
	6	12227	12887	0	0.044	0.120	0.007	0.042	0.025	16536	49915	8611	10899	10529
	7	30527	14444	0	0.074	0.173	0.019	0.074	0.047	11522	15245	8339	11067	1986
	8	75021	14343	0	0.031	0.109	0.002	0.027	0.021	12967	20025	9944	12491	2380
	9	37190	14348	0	0.043	0.082	0.021	0.040	0.025	9711	10360	8352	9876	0.585
	10	44497	14482	0	0.044	0.117	0.003	0.038	0.026	14693	24703	8441	13622	4215
	11	54024	14768	0	0.034	0.072	0.003	0.033	0.018	14796	25853	8596	12585	5044
	12	42103	14793	0	0.081	0.089	0.073	0.089	0.011	9072	9187	8986	9042	0.084
	13	6514	15463	0	0.048	0.102	0.004	0.048	0.028	10023	11447	8438	10196	0.888
	14	27265	14728	0	0.034	0.085	0.002	0.033	0.018	15688	34222	8300	13608	6414
	15	66750	11267	0	0.036	0.086	0.003	0.034	0.023	20419	30947	11801	20396	5599
	16	51458	15215	0	0.040	0.141	0.003	0.035	0.025	11710	19200	8497	11444	2205
	17	37447	16727	0	0.031	0.100	0.002	0.026	0.021	21918	56062	9369	18031	11252
	18	63999	11923	0	0.041	0.104	0.004	0.038	0.020	11716	18121	8450	10976	2432
	19	16671	18124	0	0.036	0.105	0.000	0.052	0.040	9568	12813	8288	8723	1360
	20	31033	16669	0	0.029	0.064	0.001	0.027	0.015	17713	31206	8288	17039	5798
	21	71496	13222	0	0.086	0.196	0.005	0.084	0.054	10099	13835	8413	9847	1292
	22	45819	13184	0	0.076	0.076	0.076	0.076	NaN	9110	9929	8292	9929	0.818
	23	67897	9630	0	0.033	0.104	0.003	0.022	0.038	8925	9701	8290	8784	0.466
	24	23192	13501	0	0.151	0.395	0.036	0.086	0.136	11336	12756	9343	11302	1128
	25	5937	13499	0	0.038	0.040	0.036	0.040	0.003	8863	9518	8432	8640	0.471
	26	23064	13420	0	0.162	0.591	0.011	0.106	0.153	9743	11205	8771	9647	0.709
	27	10091	13491	0	0.049	0.122	0.013	0.038	0.030	9540	11025	8572	9309	0.779
	28	31056	16643	0	0.036	0.072	0.011	0.035	0.021	10451	13926	8697	10615	1367
	29	55072	12024	0	0.074	0.108	0.046	0.065	0.024	8929	10472	8568	8772	0.590
	30	66565	10653	0	0.048	0.122	0.007	0.046	0.027	10837	13060	8970	11040	0.998
	31	54982	11954	0	0.019	0.019	0.019	0.019	NaN	8869	8957	8780	8957	0.088
	0	62390	12906	0	0.107	0.107	0.106	0.107	0.001	6529	7098	5742	6747	0.574
	1	17259	12833	0	0.036	0.045	0.028	0.045	0.012	5883	6096	5748	5806	0.152
	2	26804	13449	0	0.047	0.117	0.006	0.048	0.035	8558	14736	5603	8281	2506
	3	10567	14170	0	0.097	0.273	0.008	0.071	0.067	10881	20178	5798	9238	4545
	4	68512	8207	0	0.095	0.133	0.025	0.128	0.061	6297	6771	5976	6267	0.293
	5	46605	7964	0	0.060	0.200	0.011	0.053	0.038	8027	11994	5456	7438	2159
	6	41284	14912	0	0.084	0.210	0.028	0.075	0.057	7785	10354	5813	7973	1150
	7	12881	15764	0	0.049	0.111	0.006	0.047	0.028	7114	8854	5580	7175	0.960
	8	17883	15838	0	0.075	0.075	0.075	0.075	NaN	9023	9740	8307	9740	0.717
	9	82696	9175	0	0.048	0.143	0.000	0.048	0.037	8666	12098	5462	8247	1911
	10	69945	13807	0	0.050	0.259	0.007	0.039	0.037	10691	24627	6024	9211	4014
	11	65579	16954	0	0.049	0.115	0.008	0.047	0.027	8207	14611	5616	7521	1985
	12	31218	10370	0	0.057	0.117	0.008	0.055	0.036	6901	9126	5545	6616	0.955
	13	23236	15704	0	0.062	0.200	0.003	0.059	0.041	8727	18981	5462	7128	3480
	14	34209	11674	0	0.029	0.042	0.009	0.041	0.016	6774	7492	5792	6795	0.615
	15	34957	17603	0	0.054	0.146	0.004	0.054	0.033	8716	12590	6124	9049	1712
	16	77530	5671	0	0.087	0.155	0.040	0.089	0.034	6983	8875	5851	6939	0.690
	17	25070	11407	0	0.065	0.151	0.028	0.060	0.029	12230	21955	5757	10874	5177
	18	29735	17481	0	0.068	0.232	0.003	0.055	0.055	8643	17083	5522	7719	2756
	19	61434	16642	0	0.045	0.104	0.007	0.041	0.026	10689	20663	5604	9482	4283
	20	49216	18140	0	0.072	0.190	0.007	0.066	0.041	10199	22077	5609	8720	3744
	21	4427	12580	0	0.141	0.501	0.019	0.114	0.142	7166	10221	5905	6853	1122
	22	54733	18224	0	0.110	0.261	0.014	0.081	0.083	6594	8081	5497	6553	0.720
	23	40332	17398	0	0.060	0.192	0.009	0.047	0.042	10008	21230	5458	8237	4073
	24	77864	12839	0	0.048	0.083	0.012	0.050	0.022	5975	6990	5495	5806	0.461
	25	0.000	4851	0	0.043	0.095	0.000	0.038	0.040	6406	7088	5562	6521	0.463
	26	4116	12609	0	0.086	0.145	0.051	0.080	0.033	7689	9619	5912	7750	1162
	27	0.000	5335	0	0.095	0.095	0.095	0.095	NaN	6089	6139	6040	6139	0.049
	28	29301	16902	0	0.078	0.151	0.006	0.092	0.048	6070	6744	5537	6168	0.389
	0	63552	22688	0	0.035	0.063	0.004	0.034	0.021	7880	9547	6133	7667	1157
	1	30423	14007	0	0.070	0.179	0.011	0.052	0.049	10128	17473	6300	10037	2851
	2	31965	22670	0	0.027	0.037	0.016	0.037	0.015	7613	8269	7262	7310	0.464
	3	19433	22687	0	0.045	0.101	0.004	0.045	0.026	11237	23719	6068	10071	5003
	4	30278	23123	0	0.042	0.069	0.015	0.044	0.022	8475	9337	7448	8610	0.803
	5	22958	22929	0	0.043	0.059	0.019	0.050	0.017	7718	8080	7417	7791	0.253
	6	14244	22821	0	0.062	0.260	0.007	0.053	0.043	11437	29064	6065	9646	5474
	7	69944	23641	0	0.022	0.062	0.002	0.021	0.013	8359	10146	6706	8384	0.834
	8	41300	23263	0	0.068	0.170	0.020	0.061	0.036	8044	11719	6069	7806	1350
	9	17434	14435	0	0.072	0.138	0.023	0.081	0.043	8459	10581	6130	8784	1418
	10	43829	24861	0	0.082	0.135	0.033	0.093	0.034	7636	8579	6528	7521	0.657
	11	62750	14965	0	0.023	0.040	0.1757	0.022	0.015	8223	10655	6653	8185	1502
	12	24562	24439	0	0.038	0.086	0.006	0.038	0.019	10031	20992	6196	8609	3682
	13	7160	1619	0	0.041	0.073	0.026	0.040	0.022	6871	8003	6297	6633	0.597
	14	6027	15741	0	0.040	0.091	0.003	0.039	0.023	10818	19457	6088	9475	3735
	15	52816	25344	0	0.045	0.142	0.009	0.042	0.029	10576	22487	6166	8752	4558
	16	82438	17514	0	0.027	0.095	0.000	0.048	0.030	10145	21772	6700	9200	3629
	17	82438	8073	0	0.048	0.095	0.000	0.048	0.030	9985	12416	7562	9875	1337
	18	7858	17320	0	0.044	0.116	0.009	0.044	0.027	10331	16229	6259	9850	3106
	19	12374	17636	0	0.048	0.147	0.004	0.039	0.034	9101	18831	6103	7728	3278
	20	9688	9735	0	0.100	0.442	0.010	0.072	0.105	10290	14581	7226	10036	2124
	21	2055	9589	0	0.052	0.138	0.006	0.036	0.036	10104	16772	7275	9528	2328
	22	77201	18035	0	0.054	0.113	0.008	0.048	0.031	8464	11194	6482	8453	1357
	23	13013	10228	0	0.036	0.079	0.008	0.037	0.022	8061	10395	6380	7998	1033
	24	80029	18596	0	0.046	0.104	0.004	0.047	0.027	9317	16785	6066	8641	2806
	25	61528	18744	0	0.055	0.188	0.006	0.041	0.040	11876	25398	6140	10074	5171
	26	69419	19705	0	0.309	1073	0.033	0.091	0.510	8227	10775	6293	8347	1531
	27	32281	11411	0	0.027	0.032	0.022	0.032	0.007	8009	8706	7353	7969	0.553
	28	67304	19244	0	0.064	0.187	0.012	0.059	0.047	7492	10550	6159	7485	1059
	29	76512	20551	0	0.036	0.128	0.005	0.033	0.031	10210	19626	6116	9075	3908
	30	71481	20215	0	0.114	0.534	0.010	0.054	0.175	10836	13931	6645	10679	2151
	31	10893	19971	0	0.034	0.098	0.002	0.031	0.021	16502	43919	9211	13667	7355
	32	15340	12634	0	0.051	0.089	0.020	0.048	0.022	8750	11798	6094	8503	1592
	33	70633	12231	0	0.081	0.146	0.026	0.087	0.041	8059	9551	6810	8025	0.869
	34	40605	20648	0	0.047	0.094	0.009	0.050	0.026	10745	20088	6106	9296	3832
	35	49159	22084	0	0.036	0.102	0.003	0.033	0.022	11974	21007	6501	10325	4462
	36	28107	21663	0	0.044	0.086	0.007	0.046	0.023	10722	19011	6762	10024	3534
	37	29287	25732	0	0.056	0.056	0.056	0.056	NaN	7170	7755	6585	7755	0.585
	38	80509	3420	0	0.052	0.104	0.009	0.059	0.034	6924	9471	6070	6766	1024
	39	68180	17310	0	0.043	0.043	0.043	0.043	NaN	6624	6839	6409	6839	0.215
	40	3255	10675	0	0.060	0.090	0.026	0.064	0.032	7499	8058	6565	7992	0.600
	41	71032	20087	0	0.114	0.196	0.031	0.196	0.116	10742	11082	10367	10775	0.293
	42	59663	23083	0	0.038	0.038	0.038	0.038	NaN	6341	6385	6298	6385	0.043
	43	80559	3462	0	0.135	0.188	0.093	0.125	0.049	6638	7237	6341	6492	0.351
	44	71415	20165	0	0.168	0.575	0.020	0.067	0.177	7626	9382	6066	7511	0.915
	45	9541	9821	0	0.330	0.330	0.330	0.330	NaN	6408	6437	6380	6437	0.028
	46	49086	22086	0	0.038	0.076	0.011	0.043	0.024	6418	6746	6069	6494	0.241
	47	61446	18430	0	0.088	0.088	0.088	0.088	NaN	6397	6519	6275	6519	0.122
	48	19516	22590	0	0.159	0.159	0.159	0.159	NaN	6495	6805	6185	6805	0.310
	49	19341	22422	0	0.005	0.005	0.005	0.005	NaN	6743	6988	6498	6988	0.245
